# Supplementary material for: Unsupervised detection of fragment length signatures of circulating tumor DNA using non-negative matrix factorization
Source: eLife. 2022 Jul 27;11:e71569. doi: 10.7554/eLife.71569 (PMC9363120; doi:10.7554/eLife.71569)
Supplement: Supplementary file 1. — Sheet 1 contains raw fragment length distributions from WGS data along with ctDNA% estimates. Sheet 2 contains raw fragment length distributions from targeted data. [file elife-71569-supp1.xlsx]

## Sheet: WGS
ichorCNA tumor fraction est.	allele-frequency tumor fraction est.	Fragment length counts from WGS data
		30	31	32	33	34	35	36	37	38	39	40	41	42	43	44	45	46	47	48	49	50	51	52	53	54	55	56	57	58	59	60	61	62	63	64	65	66	67	68	69	70	71	72	73	74	75	76	77
0.06821	0.031	5968	6456	7168	7814	8536	9727	10782	11902	12537	12643	12515	12177	12463	12886	13539	13992	14886	16309	17655	18097	17080	16860	16170	16540	16590	17319	17912	18785	19563	19137	18572	16531	15133	14343	13680	13377	13656	13991	14813	14945	14030	13077	12239	11719	11725	12089	12524	13784
0.0858	0.134	551	616	629	691	753	866	970	1078	1112	1150	1135	1192	1220	1242	1317	1486	1494	1661	1884	1783	1805	1769	1734	1674	1818	1759	2036	2249	2398	2434	2353	2117	2088	2025	2026	1975	1995	2161	2336	2420	2371	2129	2102	2080	2137	2227	2265	2589
0.2514	0.847	753	896	1019	1116	1255	1419	1672	1936	2128	2223	2145	2114	2319	2343	2551	2790	3021	3538	3866	4183	4041	3852	3895	3809	4033	4203	4610	5103	5653	5870	5725	5615	5378	5252	5244	5346	5353	5582	5955	6536	6357	6386	6074	5968	5996	6263	6333	6956
0.1106	0.091	470	559	680	670	723	864	1020	1029	1224	1312	1275	1239	1351	1445	1507	1628	1759	2014	2269	2329	2359	2465	2357	2385	2486	2545	2706	2839	3100	3210	3212	3321	3086	3029	2944	2987	3007	3046	3372	3824	3686	3617	3469	3356	3381	3391	3449	3542
0.03	NA	1007	1174	1346	1441	1724	1905	2148	2272	2468	2515	2532	2551	2663	2796	2898	3043	3278	3492	3872	4044	3768	3902	4067	4268	4443	4598	4984	5269	5374	5431	5264	4896	4615	4572	4320	4234	4144	4242	4214	4604	4369	4074	4008	3907	3869	3806	3828	4040
0.06448	NA	1129	1341	1548	1735	1909	2218	2437	2746	2939	3187	3097	3186	3320	3515	3577	3884	4189	4642	5060	5450	5431	5648	5568	5819	6147	6338	6621	6960	6944	7057	6781	6131	5773	5540	5238	5017	4856	5072	5188	5067	5036	4567	4442	4250	4070	4096	4236	4481
0.07163	0.034	962	1163	1463	1650	1989	2250	2743	3248	3603	3583	3583	3629	3705	3812	4160	4550	4971	5644	6379	7043	6738	6869	7035	7136	7451	7813	8238	8669	9093	8937	8645	8095	7369	6955	6662	6568	6357	6459	7099	7182	6654	6370	5885	5585	5608	5754	5802	6485
0.05709	0.033	1429	1684	2045	2161	2436	2687	2881	3139	3417	3613	3535	3736	3844	3890	4030	4328	4490	5051	5363	5684	5860	5887	6095	6141	6357	6469	6639	6620	6409	6439	6226	5926	5495	5460	5292	4953	4795	4758	4991	5080	4913	4642	4458	4358	4393	4355	4425	4357
0.03	NA	1650	1789	1981	2140	2542	2789	3237	3756	4031	3985	3893	3853	3762	4165	4228	4560	4949	5537	6127	6554	5992	5719	5796	5809	5937	6097	6476	7031	7620	7997	7455	6988	6578	6320	6264	6102	6078	6502	7169	7816	7478	6688	6288	6091	5972	6141	6751	7516
0.5684	0.858	1063	1325	1510	1718	1909	2181	2970	3557	4212	4133	3993	3959	4081	4433	4612	5149	5875	6681	7709	8297	7549	7086	6816	6806	7026	7368	8027	8640	9765	10254	9916	8854	8252	8134	7993	8319	8617	9450	10886	11732	11516	10334	9289	8888	8940	9211	10121	10957
0.212	0.557	742	858	931	1103	1098	1271	1402	1688	1820	1862	1739	1799	1872	1933	1980	2171	2319	2665	2999	3114	2899	2778	2669	2890	2741	2889	3197	3416	3704	3894	3753	3434	3250	3209	3155	3099	2919	3114	3476	3617	3536	3434	3208	3197	3162	3216	3351	3621
0.0379	0.095	1067	1299	1403	1605	1840	2195	2564	2929	3144	3208	3172	3292	3219	3331	3482	3841	4048	4566	5167	5486	5266	4885	4861	4965	5192	5223	5540	6003	6588	6483	6420	5940	5599	5327	5090	5021	5042	5010	5660	5687	5418	5080	4790	4735	4722	4606	4928	5073
0.03	NA	2322	2547	2829	3239	3741	4246	5086	5749	6289	6291	6308	6167	6188	6333	6463	7020	7656	8567	9405	9820	9382	8947	8762	8765	8654	9388	9591	10114	10784	10707	10023	9169	8389	7952	7695	7383	7192	7705	8260	8447	8050	7210	6658	6242	6355	6196	6602	7218
0.3772	0.634	433	513	596	667	743	930	1154	1438	1644	1767	1799	1870	1977	2040	2246	2464	2757	3460	3973	4491	4094	3759	3578	3550	3714	3722	4191	4691	5533	6182	5970	5335	4991	4846	4718	4645	4748	5326	5974	6780	6959	6293	5941	5328	5537	5598	5796	6046
0.06443	0.102	1125	1303	1444	1588	1918	2111	2371	2769	3076	3119	2974	2949	3094	3072	3487	3844	4079	4521	4982	5114	4927	4638	4408	4328	4590	4822	5152	5725	6050	6350	5986	5447	5146	4919	4680	4691	5071	5328	5859	6095	5654	5230	4856	4570	4744	4779	5190	5809
0.06497	0.068	668	783	863	989	1162	1339	1644	1922	2172	2226	2095	2298	2164	2393	2679	2840	3203	3631	4019	4197	3989	3706	3660	3642	3936	4147	4398	4873	5317	5682	5366	4973	4703	4544	4573	4393	4641	4728	5298	5427	5321	4915	4539	4392	4460	4392	4849	5285
0.1945	0.472	327	372	454	473	520	576	707	807	953	1059	937	988	1072	1082	1153	1314	1483	1717	1803	2052	2039	1873	1820	1925	1938	2067	2267	2530	2917	3062	3060	2817	2643	2621	2522	2490	2657	2903	3322	3436	3486	3143	3155	2891	3024	3127	3199	3834
0.42	0.826	110	124	149	166	225	266	318	449	469	519	539	572	581	648	689	832	878	1176	1412	1560	1576	1570	1624	1599	1721	1741	2024	2331	2633	3011	2951	3044	2920	3024	3114	3118	3329	3737	4236	4909	5163	5164	5100	4893	5148	5269	5599	6086
0.1291	0.155	1295	1522	1647	1820	2038	2275	2529	2880	2968	3096	3029	3027	3099	3187	3318	3349	3545	3901	4165	4257	4253	4192	4126	4261	4381	4574	4660	5025	5308	5395	5155	4772	4566	4441	4178	4141	3986	4120	4328	4350	4447	3958	3902	3650	3619	3794	3820	4013
0.1286	0.098	941	1089	1314	1308	1477	1716	1949	2118	2412	2379	2294	2239	2316	2507	2569	2755	2788	3141	3392	3642	3409	3273	3250	3083	3174	3280	3379	3630	3937	4185	3957	3691	3396	3249	3098	3045	2957	2948	3033	3216	3223	3078	2859	2885	2741	2627	2846	2896
0.03	NA	493	551	597	678	764	795	1074	1163	1198	1248	1217	1226	1203	1350	1305	1364	1489	1736	1838	1962	1776	1800	1611	1730	1723	1851	1945	1998	2264	2387	2377	2194	2051	1998	1920	1849	1899	1967	2229	2272	2204	2061	2011	1911	1976	1933	1983	2204
0.6242	0.579	1033	1240	1487	1723	2083	2544	3126	4162	5057	5292	5334	5504	5675	6095	6269	6726	7588	9121	10895	11792	10882	9924	9539	9114	8987	8971	9430	11070	13066	14354	14209	12788	11678	11461	10801	10168	10499	11113	12385	13739	13951	13831	12895	12368	11616	11006	11101	11453
0.2743	0.208	149	172	217	244	282	351	375	446	455	496	433	512	457	557	580	680	706	805	929	959	925	889	902	807	915	1016	1127	1207	1371	1328	1359	1335	1333	1276	1304	1344	1301	1465	1618	1749	1716	1621	1525	1511	1625	1689	1734	1941
0.07745	0.009	2544	2639	2957	3258	3475	3877	4337	4567	4845	5171	5054	5057	5297	5330	5638	5831	6535	6836	7326	7758	7458	7306	7720	7864	8125	8560	8928	9077	9535	9479	8690	8500	7747	7642	7457	7388	7298	7404	7885	7860	7367	7065	6656	6349	6408	6667	6739	7302
0.06633	0.097	810	1023	1162	1258	1478	1623	1962	2283	2469	2489	2511	2529	2611	2756	3020	3075	3503	3752	4298	4689	4559	4722	4647	4813	5064	5265	5480	5880	6064	5768	5524	5183	4766	4524	4266	4150	4332	4299	4570	4707	4522	4246	3814	3614	3636	3855	3951	4319
0.1611	0.182	1210	1311	1376	1598	1672	1972	2145	2442	2785	2757	2664	2691	2686	2869	2939	3167	3433	4087	4472	4930	4442	4293	4113	4159	4167	4175	4469	4898	5360	5731	5614	5269	5038	4829	4836	4820	4910	5371	5910	6424	6315	6021	5766	5529	5554	5648	5740	6631
0.3294	0.742	584	606	680	737	809	900	937	1099	1169	1206	1201	1131	1146	1221	1213	1301	1402	1503	1746	1850	1776	1640	1669	1676	1724	1782	1990	2009	2211	2230	2160	2026	1877	1878	1844	1828	1828	1967	2077	2173	2191	1999	2046	1878	1939	2068	2022	2306
0.4375	0.683	561	622	703	801	860	927	1087	1283	1398	1447	1343	1422	1503	1633	1693	1942	2013	2187	2452	2802	2582	2638	2611	2642	2608	2700	2925	3151	3491	3899	3749	3589	3572	3503	3491	3374	3397	3473	3857	4051	4145	3996	3826	3731	3743	3700	3960	4143
0.08062	0.116	1664	1845	2133	2265	2458	2687	3165	3257	3662	3637	3541	3482	3714	3809	3948	4206	4422	4833	5686	5635	5541	5630	5635	5745	5822	6044	6037	6211	6436	6456	6138	5746	5236	4911	4741	4753	4672	4679	5108	5189	4955	4668	4152	4105	4094	4050	4324	4705
0.07304	0.134	392	436	481	522	569	590	741	777	846	890	854	916	907	971	1007	1089	1285	1470	1580	1722	1711	1658	1674	1849	1859	2041	2175	2375	2610	2700	2695	2465	2355	2406	2376	2321	2452	2688	2829	2939	2992	2924	2694	2625	2662	2787	3016	3417
0.03	NA	781	860	934	1047	1115	1196	1320	1511	1642	1633	1504	1549	1609	1686	1821	1746	1792	1965	2227	2247	2131	2130	2134	2207	2143	2279	2328	2447	2558	2778	2564	2507	2279	2172	2128	2091	1984	2098	2246	2475	2246	2095	2022	1955	1977	2033	2085	2293
0.728	0.749	127	110	121	150	169	168	206	248	305	321	288	321	320	351	384	398	426	514	598	669	621	624	569	608	644	665	764	901	950	1030	1049	977	951	1014	940	995	1038	1207	1274	1427	1389	1269	1232	1285	1266	1335	1479	1758
0.6482	0.614	281	280	349	377	437	456	573	598	770	744	770	797	843	873	961	999	1097	1316	1421	1552	1550	1511	1524	1518	1543	1595	1748	2048	2362	2428	2516	2349	2357	2410	2380	2350	2404	2608	2983	3103	3170	3116	2948	2951	3102	3080	3271	3916
0.6011	NA	236	245	290	330	346	404	446	550	598	642	595	666	619	629	723	776	869	971	1159	1221	1149	1156	1135	1166	1184	1341	1422	1613	1858	1920	1863	1777	1688	1712	1681	1733	1816	1973	2215	2467	2373	2103	2055	1980	2071	2251	2297	2634
0.5289	0.233	258	277	322	353	357	440	551	627	678	719	711	653	676	769	758	899	972	1160	1419	1437	1372	1388	1295	1308	1251	1376	1474	1695	1836	2145	2071	1972	1848	1852	1790	1833	1826	1979	2288	2534	2551	2460	2295	2255	2308	2376	2551	2845
0.3321	0.099	421	461	596	602	685	829	918	1188	1227	1282	1305	1379	1407	1473	1638	1706	1924	2236	2625	2866	2784	2781	2739	2901	2819	2994	3253	3518	4234	4310	4258	4102	3921	3996	3895	3901	3801	3877	4310	4672	4537	4376	4354	4337	4338	4286	4266	4648
0.2593	0.268	237	301	309	365	430	502	500	606	605	717	699	731	729	715	816	862	936	1012	1162	1191	1255	1158	1285	1277	1344	1395	1489	1608	1721	1774	1759	1702	1665	1592	1572	1585	1629	1710	1810	1907	1918	1883	1753	1820	1726	1826	1959	2132
0.03	NA	1044	1221	1375	1569	1713	1987	2312	2558	2905	2880	2859	2931	2947	3129	3309	3431	3781	4187	4631	4891	4560	4426	4434	4519	4644	4909	5156	5602	6064	6220	6045	5828	5394	5163	4975	4875	4717	4846	5386	5454	5266	4912	4709	4581	4594	4560	4622	4883
0.03	NA	550	676	686	838	906	1070	1143	1413	1562	1625	1562	1463	1439	1570	1644	1828	1889	2335	2557	2754	2573	2498	2349	2350	2479	2617	2779	3066	3357	3342	3284	2973	2860	2692	2622	2695	2711	2964	3324	3493	3476	3055	2882	2689	2952	2856	3053	3656
0.03	NA	2051	2206	2486	2986	3452	3856	4368	5097	5401	5607	5572	5406	5427	5763	6030	6130	6617	7113	7759	7947	7474	7253	7098	7051	7320	7432	7743	8017	8585	8300	8032	7432	6778	6538	6320	6106	5944	6097	6263	6407	6094	5658	5175	4935	5034	5034	5133	5518
0.04492	0.054	383	451	484	597	606	713	791	904	991	1029	969	1026	1039	1099	1258	1361	1459	1640	1845	1951	1901	1891	1990	2087	2240	2460	2519	2702	2941	2901	2907	2774	2551	2678	2623	2517	2581	2744	2977	3209	3045	2900	2813	2757	2755	2774	3018	3335
0.06582	0.05	3024	3466	4161	4628	5355	6084	6984	7963	8484	8580	8238	8480	8525	8644	9113	9507	10299	10948	11713	12241	11632	11158	11230	11202	11320	11577	11841	12027	12457	12305	11530	10449	9789	9205	8474	8285	8146	8365	8693	8714	8270	7534	6999	6824	6834	6702	6815	7529
0.03	0.043	752	861	930	1100	1198	1423	1638	1858	2074	2098	2139	2040	2145	2293	2346	2457	2808	2914	3348	3430	3428	3189	3143	3144	3244	3486	3707	3933	4270	4458	4310	3959	3797	3564	3520	3431	3338	3566	3936	3878	3849	3731	3493	3271	3365	3356	3722	3849
0.2248	0.236	589	683	765	821	865	1078	1194	1397	1500	1578	1462	1392	1454	1514	1685	1716	1861	2080	2411	2420	2267	2118	2055	2098	2143	2254	2427	2512	2946	2974	2836	2738	2522	2439	2539	2346	2360	2494	2694	2925	2987	2819	2592	2553	2529	2497	2769	2905
0.03	0.046	510	599	705	754	920	1100	1203	1497	1529	1607	1635	1617	1630	1867	1958	1946	2202	2492	2693	2858	2825	2578	2717	2562	2858	2871	3157	3407	3755	3777	3725	3550	3426	3410	3254	3308	3333	3549	3983	4332	4109	3854	3795	3574	3612	3712	3974	4546
0.06421	0.134	1196	1372	1698	1918	2198	2435	2906	3290	3619	3842	3685	3820	3952	4163	4406	5010	5432	5938	6697	7327	7458	7445	7839	7977	8424	8592	8743	9128	9381	9050	8806	8072	7633	7262	7018	6859	6727	6859	7197	7274	7091	6539	6043	5990	5978	6093	6458	6688
0.3149	0.507	885	981	1116	1203	1412	1598	1869	2097	2234	2335	2428	2372	2415	2396	2679	2715	3034	3524	3865	4061	4011	3955	4096	4179	4252	4552	4776	5202	5461	5549	5555	5300	5116	5161	4899	4783	4770	5057	5117	5463	5298	5380	5010	4876	4880	4764	4983	5326
0.03	NA	620	644	823	957	1082	1249	1404	1603	1753	1910	1926	1913	1931	2157	2324	2541	2810	3102	3415	3698	3755	3654	3886	4005	4052	4448	4519	4892	5140	5099	5036	4743	4275	4226	4198	4148	4021	4056	4439	4512	4302	3947	3818	3713	3766	3823	3816	4256
0.03	NA	1091	1120	1302	1411	1535	1751	1973	2194	2264	2434	2392	2270	2329	2561	2566	2772	3176	3359	3738	4052	3632	3493	3435	3454	3568	3775	3989	4341	4598	4550	4467	4156	3785	3688	3582	3578	3642	3989	4327	4571	4566	3814	3766	3721	3630	3780	4108	4604
0.03	NA	1431	1534	1789	1972	2187	2533	2803	3071	3430	3346	3411	3413	3482	3587	3754	3948	4159	4717	5034	5081	4921	4710	4699	4857	5055	5127	5192	5519	5568	5567	5294	4822	4539	4408	4182	4102	4095	4102	4511	4741	4271	4133	3885	3695	3660	3764	3950	4336
0.03	NA	592	711	699	768	889	982	1083	1286	1280	1470	1434	1426	1356	1594	1632	1822	1920	2200	2413	2443	2538	2519	2503	2776	2869	3086	3180	3258	3611	3576	3390	3214	3012	2981	2935	2869	2950	3083	3204	3210	3252	3105	2819	2867	2937	2990	2966	3360
0.03	NA	2076	2270	2525	2635	3069	3223	3641	4238	4393	4417	4518	4431	4586	4551	5008	5060	5630	6162	6779	7077	6896	6858	6884	6966	7228	7501	7729	7782	8179	8031	7713	7297	6662	6294	6011	5828	5707	5882	6121	6250	5920	5319	5072	4903	4850	4828	5045	5501
0.03	0.051	447	472	541	616	624	760	929	988	1052	1040	1062	1039	1072	1147	1215	1344	1335	1430	1715	1722	1644	1497	1665	1549	1678	1774	1786	1963	2025	2151	2039	1881	1736	1796	1651	1668	1732	1835	1918	2055	1954	1856	1781	1734	1715	1842	1901	2027
0.2937	0.147	488	515	571	605	721	809	844	1006	1016	1044	943	981	1065	1057	1162	1136	1184	1242	1349	1421	1338	1303	1252	1331	1344	1353	1441	1509	1685	1618	1597	1533	1377	1605	1439	1422	1520	1534	1605	1708	1691	1575	1545	1492	1502	1556	1642	1755
0.03	NA	547	666	694	845	904	1052	1208	1403	1453	1555	1618	1742	1762	1870	1913	2087	2433	2640	3089	3291	3153	3177	3338	3542	3723	3967	4266	4523	4754	5135	5015	4589	4668	4547	4387	4167	4240	4299	4714	4900	4758	4519	4419	4127	4081	4318	4406	4690
0.03	NA	1940	2230	2462	2728	2959	3430	3915	4361	4772	4931	4486	4490	4473	4371	4713	5084	5297	5726	6586	6745	6235	5788	5550	5524	5438	5796	6060	6547	6906	7133	6844	6343	5551	5270	5286	5112	5233	5419	6104	6317	6172	5493	5036	4819	4787	4802	5144	5827
0.03	NA	1640	1823	2086	2371	2615	3002	3332	3593	3913	4092	3954	3968	3971	4200	4554	4783	4968	5522	5781	6008	5556	5442	5267	5266	5345	5686	5943	6246	6739	6702	6286	5646	5114	4711	4583	4625	4520	4862	5116	5220	4845	4292	4068	3733	3840	3870	4100	4568
0.03	NA	788	916	1010	1174	1359	1462	1651	1874	1937	2006	1954	1947	2041	2120	2229	2352	2477	2703	2925	2937	2719	2548	2481	2684	2704	2763	2909	3170	3386	3371	3264	2814	2640	2583	2473	2449	2292	2592	2720	2666	2486	2369	2143	2130	2045	2320	2245	2486
0.03	NA	434	474	524	570	644	721	816	918	980	1076	1067	1003	1082	1142	1213	1272	1381	1558	1839	1973	1920	1935	1998	2011	2117	2206	2389	2595	2713	2826	2707	2521	2495	2322	2321	2218	2185	2351	2546	2593	2595	2472	2262	2335	2319	2364	2472	2911
0.05509	0.058	592	725	851	914	1095	1213	1443	1584	1685	1877	1857	1827	1972	2020	2144	2343	2540	2767	3201	3231	3119	3043	3001	2883	3028	3379	3590	3814	4298	4371	4164	3834	3606	3661	3545	3434	3601	3854	4270	4378	4171	3903	3749	3551	3753	3771	4108	4621
0.3257	0.537	203	221	298	320	377	507	509	655	691	805	874	902	983	1087	1144	1323	1492	1785	2023	2205	2183	2377	2304	2419	2713	2887	3200	3535	4040	4223	4224	4315	4565	4568	4791	4869	5006	5369	6055	6558	6928	7346	7580	7781	8341	8510	8935	9124
0.03	NA	600	760	815	926	1105	1257	1313	1416	1545	1629	1517	1538	1518	1582	1793	1798	1985	2186	2374	2411	2339	2127	2161	2270	2348	2447	2643	2853	2893	3003	2979	2719	2660	2476	2417	2456	2497	2535	2907	2842	2822	2612	2417	2325	2362	2409	2629	2741
0.6187	0.817	793	893	1077	1126	1168	1520	1710	1945	2143	2226	2061	2133	2234	2327	2415	2533	2839	3273	3736	3922	3852	3672	3614	3850	4007	4110	4361	4697	5051	5013	5141	5015	5133	5021	4866	4683	4656	4650	4806	5069	4895	4550	4700	4585	4493	4539	4472	5056
0.5592	0.369	151	165	219	192	229	244	298	330	358	352	383	365	363	376	405	491	461	583	643	678	620	662	607	609	688	650	778	759	949	926	932	914	852	842	911	840	930	1002	1052	1121	1156	1130	1048	1091	1068	1116	1128	1307
0.5773	0.401	428	454	539	631	680	799	822	1025	1050	1106	1109	1161	1112	1092	1231	1202	1314	1422	1574	1673	1556	1532	1442	1469	1615	1708	1743	1870	2026	2037	2092	1975	1977	1918	1954	1879	1812	1929	2056	2199	2079	1982	1896	1946	1918	2040	2049	2309
0.1054	0.321	702	821	948	1063	1195	1396	1501	1685	1809	1753	1827	1734	1859	1957	1868	1940	2198	2335	2376	2532	2435	2291	2288	2265	2267	2452	2479	2684	2927	3010	2859	2775	2584	2555	2519	2595	2447	2591	2700	2729	2591	2535	2426	2281	2305	2402	2453	2776
0.03	NA	535	648	719	822	948	1055	1317	1406	1525	1657	1592	1620	1741	1938	2017	2134	2273	2485	2710	2896	2758	2915	2858	3064	3118	3261	3399	3758	4045	4176	4007	3746	3462	3443	3397	3377	3209	3405	3579	3665	3405	3301	3211	3145	3225	3196	3402	3522
0.03	NA	712	907	1003	1202	1380	1593	1795	2092	2224	2317	2417	2336	2460	2692	2831	2897	3223	3522	3809	3903	3815	3834	3739	3860	3931	4236	4450	4886	5005	5196	5319	4848	4671	4527	4452	4416	4381	4569	4747	4901	4834	4572	4238	4100	4139	4189	4371	4590
0.03	NA	955	1066	1201	1336	1617	1740	2001	2269	2478	2501	2464	2522	2579	2793	2958	3201	3366	3494	3765	3789	3726	3588	3482	3654	3900	4035	4385	4533	4937	5162	4821	4361	4001	4004	3833	3906	4008	4112	4277	4328	4114	3801	3531	3453	3361	3622	3612	4130
0.6652	0.711	1053	1243	1421	1477	1546	1793	1990	2104	2351	2315	2379	2329	2254	2332	2369	2444	2676	3086	3439	3539	3517	3535	3387	3496	3498	3798	3964	4104	4452	4637	4549	4202	4041	3916	3884	3805	3845	4003	4305	4567	4366	4046	3921	3650	3830	3775	4056	4674
0.2472	0.54	372	449	486	534	627	708	852	998	1093	1099	1168	1155	1245	1321	1451	1432	1656	1876	2058	2265	2082	2005	2014	2067	2208	2342	2509	2618	2942	3090	3109	2923	2825	2781	2731	2771	2772	2948	3162	3247	3151	3017	3025	2994	3010	3091	3274	3290
0.6177	0.895	810	912	1049	1079	1307	1386	1661	1864	2097	2090	2138	2209	2237	2269	2311	2467	2616	3072	3596	3831	3675	3480	3574	3507	3592	3790	4050	4222	4744	5337	5083	4760	4533	4336	4274	4208	4309	4492	5018	5383	5470	5107	4761	4518	4620	4590	4625	5211
0.2957	0.694	451	493	501	607	663	749	919	1043	1127	1173	1226	1260	1304	1315	1499	1509	1649	1880	2156	2319	2175	2058	2168	2210	2218	2318	2472	2848	2997	3161	3057	2927	2752	2801	2793	2593	2794	2857	3107	3248	3214	3027	2950	2886	2934	3030	2994	3217
0.03	NA	489	574	699	747	884	1000	1155	1265	1446	1446	1471	1545	1545	1573	1670	1814	2002	2183	2405	2554	2392	2308	2368	2319	2682	2698	2875	3168	3362	3349	3289	2977	2779	2785	2733	2663	2796	3074	3436	3357	3383	2993	2856	2779	2724	2780	2968	3294
0.03	NA	865	985	1096	1199	1289	1506	1695	1763	1954	1944	1893	1906	1985	2040	2030	2198	2148	2448	2725	2841	2673	2499	2488	2679	2651	2822	2903	2960	3302	3379	3277	3136	2935	2893	2826	2811	2822	2878	3381	3441	3377	3287	2951	2869	2967	2946	3218	3442
0.03	NA	1248	1403	1499	1678	1823	2042	2314	2569	2744	2882	2778	2782	2893	3118	3267	3369	3696	4207	4681	4824	4696	4888	4982	5025	5356	5561	5842	6261	6484	6564	6618	6403	5867	6009	5636	5451	5221	5370	5493	5514	5466	5219	4950	4768	4782	4832	4857	4928
0.03	NA	464	521	547	613	660	655	797	982	972	1051	965	980	1017	1028	1087	1198	1219	1403	1495	1640	1620	1633	1680	1721	1907	1964	2110	2250	2323	2395	2374	2267	2237	2089	2047	2002	2055	2176	2240	2338	2294	2103	2142	2072	2053	2175	2180	2519
0.243	0.307	155	193	209	241	242	263	369	414	475	502	470	458	494	529	626	569	723	790	872	952	854	902	868	861	905	949	1038	1158	1273	1457	1442	1414	1286	1380	1310	1267	1360	1416	1490	1579	1634	1586	1542	1471	1543	1596	1678	1810
0.07316	0.109	893	952	1100	1274	1412	1529	1807	2009	2189	2269	2310	2145	2223	2461	2594	2714	2975	3263	3590	3829	3651	3676	3739	3787	3993	4234	4327	4574	5049	5048	5024	4599	4244	3970	4111	3966	3892	4120	4604	4570	4432	4169	3770	3869	3783	3844	4043	4515
0.2139	0.259	792	855	1030	1118	1228	1333	1608	1782	2015	2012	1967	1942	1960	2112	2168	2199	2580	2771	3297	3465	3320	3128	3227	3386	3419	3518	3630	4052	4290	4239	4115	3836	3671	3486	3397	3318	3353	3542	3925	4177	3961	3558	3367	3274	3178	3314	3542	4001
0.03	NA	1390	1456	1617	1799	1983	2257	2569	2857	3099	3070	3142	3168	3140	3195	3300	3678	4080	4528	5262	5544	5391	5289	5206	5177	5611	5736	5996	6616	6897	7006	6623	6094	5820	5410	5259	5044	5166	5451	5906	5985	5629	5357	4949	4762	4823	4983	5261	5938
0.03	NA	162	197	230	260	267	327	416	491	563	567	532	572	552	652	678	732	857	909	1131	1134	1053	962	1063	1102	1147	1226	1362	1459	1743	1694	1755	1731	1584	1580	1559	1574	1686	1793	2081	2123	2132	2037	1902	1871	1887	1984	2096	2458
0.03	NA	488	569	650	768	973	1086	1160	1446	1612	1663	1628	1670	1653	1757	1820	2019	2199	2539	2694	2867	2836	2753	2686	2758	2847	3068	3244	3585	3966	4073	4017	3800	3669	3586	3509	3446	3524	3720	4007	4295	4139	3833	3704	3523	3563	3532	3774	3923
0.03	NA	783	797	929	975	1127	1264	1361	1618	1717	1689	1704	1731	1955	1998	2058	2305	2490	2797	2905	3146	3054	3016	3047	3248	3421	3606	3842	4101	4521	4716	4571	4274	3913	3796	3751	3875	3997	4186	4415	4601	4230	3975	3970	3873	4117	4277	4714	5176
0.2844	0.528	705	793	851	860	968	1175	1278	1491	1664	1657	1698	1733	1692	1900	1958	2093	2219	2702	2904	2871	2824	2591	2584	2776	2809	2887	2953	3169	3629	3747	3510	3291	3143	3205	3031	3016	2983	3230	3516	3498	3582	3309	3054	2947	3025	3121	3207	3469
0.4648	0.857	1444	1629	1700	1887	2045	2298	2464	2668	2807	2710	2750	2705	2692	2939	3034	3099	3237	3327	3409	3637	3329	3295	3204	3326	3466	3347	3380	3630	3730	3569	3495	3277	3158	2978	3027	2920	2859	2944	3063	3113	2891	2913	2534	2421	2495	2469	2588	2896
0.2954	0.618	804	880	1048	1145	1277	1390	1545	1780	1847	1774	1906	1915	1911	2108	2115	2089	2324	2511	2627	2728	2570	2543	2541	2544	2621	2722	2796	2877	3009	3017	2924	2616	2602	2458	2538	2276	2337	2328	2523	2567	2378	2274	2084	2108	2122	2107	2092	2340
0.03	NA	835	905	1109	1304	1456	1645	1903	2256	2435	2588	2647	2582	2657	2841	3085	3168	3483	3818	4148	4389	4134	4139	3975	3966	4136	4398	4572	4825	5159	5266	5061	4644	4195	4152	4155	4009	4048	4288	4793	4963	4732	4376	4052	3828	3788	3989	4263	4711
0.03	NA	681	682	823	904	924	1051	1203	1410	1405	1417	1527	1467	1428	1595	1558	1689	1771	1966	2166	2332	2259	2111	2256	2345	2399	2449	2660	2755	3069	3057	3022	2836	2625	2487	2356	2408	2355	2609	2686	2788	2749	2353	2280	2215	2298	2279	2356	2663
0.1025	0.11	503	537	573	600	669	743	812	936	942	975	1007	992	1011	1085	1082	1113	1222	1329	1486	1487	1453	1385	1424	1460	1458	1333	1520	1741	1839	1809	1736	1717	1589	1526	1576	1415	1504	1676	1654	1828	1731	1677	1680	1544	1559	1551	1736	1840
0.1718	0.173	424	516	556	628	719	786	939	1099	1298	1305	1303	1346	1362	1434	1577	1689	1900	2087	2637	2831	2742	2709	2607	2578	2536	2743	2806	3280	3871	4041	3955	3789	3678	3471	3588	3544	3606	3888	4396	4730	4799	4472	4323	4058	4053	3997	4171	4491
0.03	NA	682	815	921	941	1110	1294	1363	1628	1732	1673	1755	1747	1884	1884	1988	2208	2400	2565	2731	2929	2790	2771	2835	2820	3042	3117	3486	3633	3946	3988	3879	3666	3548	3479	3367	3192	3340	3645	3935	4098	3915	3637	3470	3306	3441	3409	3723	4040
0.2537	0.229	406	520	532	604	669	790	791	901	882	994	985	952	1013	1115	1181	1131	1292	1414	1469	1599	1547	1410	1554	1513	1567	1569	1700	1850	1992	2021	2040	2000	1916	1857	1897	1947	1863	1949	1992	2118	2133	2045	1964	2011	1906	1976	2101	2231
0.1162	0.107	668	823	853	1036	1120	1170	1355	1490	1733	1681	1647	1654	1721	1891	1931	2048	2173	2297	2591	2689	2547	2542	2462	2587	2648	2854	2886	3159	3356	3494	3357	3216	3183	3110	3132	2892	2995	3095	3225	3397	3444	3243	3219	3052	3081	3110	3211	3461
0.08381	NA	1996	2232	2360	2721	3167	3524	4038	4605	5091	5145	4993	4712	4683	4893	4927	5273	5598	6414	7030	7570	6930	6546	6229	6126	6029	6112	6551	7069	7418	7620	7307	6537	5876	5577	5287	5039	4942	5286	6074	6320	5938	5320	4954	4529	4392	4502	4756	5375
0.6655	0.601	789	863	984	1054	1232	1233	1472	1736	1787	1867	1817	1805	1838	1841	1939	2152	2253	2455	2962	3063	3067	2914	2757	2868	2830	3053	3239	3505	3916	4191	4118	4023	3619	3605	3427	3522	3466	3584	3954	4372	4485	4319	4100	3975	4041	4061	4105	4554
0.03	NA	1004	1112	1265	1285	1422	1502	1621	1761	1874	1895	1914	1809	1948	1888	2017	1941	2158	2139	2370	2334	2217	2218	2207	2248	2391	2477	2473	2522	2689	2755	2671	2497	2330	2400	2259	2358	2273	2380	2516	2546	2547	2422	2294	2341	2272	2256	2298	2525
0.03	NA	780	863	1019	1053	1224	1397	1441	1617	1819	1906	1784	1861	1831	1956	2030	2133	2246	2473	2578	2836	2751	2835	2580	2723	2872	3039	3197	3161	3335	3322	3178	3140	2964	2796	2825	2750	2686	2807	2985	3289	3157	2990	2877	2892	2820	2919	2997	3388
0.1233	0.131	686	766	808	968	967	1182	1230	1412	1581	1574	1496	1547	1517	1540	1593	1811	1864	2056	2335	2349	2343	2222	2130	2335	2376	2425	2560	2779	3041	3054	3047	2749	2618	2492	2541	2447	2447	2523	2945	3004	3066	2769	2653	2539	2658	2752	2884	3200
0.03	0.064	189	223	288	290	319	381	422	496	522	524	565	522	556	566	637	672	692	873	972	958	953	924	928	982	942	1000	1172	1235	1369	1386	1385	1358	1259	1296	1349	1331	1394	1483	1615	1773	1728	1716	1591	1551	1690	1689	1800	1986
0.1354	0.132	800	941	1067	1218	1276	1579	1762	1939	2212	2215	2316	2337	2389	2505	2491	2669	2871	3288	3693	3861	3691	3541	3558	3619	3778	3954	4022	4533	4878	5068	5117	4778	4632	4580	4515	4332	4222	4431	4642	4824	4849	4661	4594	4445	4362	4443	4473	4634
0.03	NA	991	1088	1135	1344	1383	1566	1703	1824	1991	1898	2023	1973	2072	2147	2161	2219	2310	2571	2815	2929	2962	2753	2901	2961	3094	3132	3489	3509	3792	3876	3552	3582	3242	3166	3067	3045	2848	3030	3149	3152	3144	2889	2731	2721	2643	2765	2779	3114
0.07924	0.08	1032	1259	1509	1758	2011	2480	2920	3182	3556	3719	3646	3674	3792	4064	4267	4647	4773	5359	5800	6002	6037	5922	5927	6104	6246	6604	6720	7070	7442	7290	6991	6339	5859	5643	5256	4995	4966	5286	5277	5548	5225	4650	4421	4192	4044	4163	4377	4717
0.05592	0.05	1283	1489	1730	1964	2133	2496	2872	3219	3495	3505	3524	3629	3672	3753	3965	4221	4333	4812	5058	5300	4985	4778	4586	4603	4604	4735	5346	5611	6115	6222	6011	5487	5263	4853	4763	4817	4649	4816	5307	5423	5108	4655	4468	4327	4312	4251	4398	4757
0.03	NA	632	762	868	952	1006	1202	1460	1526	1692	1850	1758	1712	1783	1881	2050	2059	2216	2535	2705	2954	2748	2582	2589	2581	2765	2929	3164	3324	3454	3541	3478	3200	3158	2868	2828	2691	2775	2777	3012	3147	3010	2907	2716	2587	2621	2619	2614	2963
0.03	NA	921	1090	1172	1308	1511	1796	2129	2382	2585	2675	2654	2601	2643	2815	3045	3118	3474	3898	4221	4281	4122	3965	3958	4028	4068	4251	4603	4952	5411	5462	5164	4793	4614	4322	4033	3956	4063	4346	4522	4677	4553	4010	3810	3772	3722	3814	3939	4399
0.0729	0.185	515	615	729	805	940	1191	1250	1461	1680	1709	1695	1816	1750	2000	2047	2280	2593	2993	3390	3826	3792	3763	3859	4019	4180	4236	4549	4805	5303	5311	5271	4976	4410	4365	4318	4230	4240	4523	5013	5197	5125	4668	4458	4321	4359	4541	4780	5333
0.03	NA	575	658	735	738	827	908	1018	1083	1258	1202	1122	1113	1162	1228	1317	1320	1371	1461	1659	1810	1696	1482	1528	1608	1600	1654	1758	1975	1966	2068	2038	1817	1713	1655	1687	1603	1644	1758	1899	2076	1992	1871	1712	1624	1656	1700	1815	1891
0.0954	0.124	1890	2233	2603	3035	3373	3901	4405	5005	5570	5637	5728	5845	6066	6211	6676	7131	7579	8052	8563	8970	8804	8762	9107	9492	9776	10253	10316	10908	11159	10891	10392	10016	9030	8727	8556	8201	7984	8081	8368	8322	7930	7328	6856	6563	6710	6607	6517	6997
0.2188	0.267	1116	1238	1505	1608	1782	2113	2355	2652	2984	3045	2865	2939	2885	3234	3136	3400	3621	4058	4301	4471	4259	4140	4188	4286	4291	4272	4614	4704	5098	5038	4813	4230	3838	3624	3705	3523	3564	3482	3781	3884	3480	3279	3067	2900	2960	2985	3137	3386
0.03	NA	170	212	243	282	334	388	421	478	500	570	580	584	644	648	722	754	835	938	1073	1101	1028	1054	1117	1118	1107	1215	1322	1512	1567	1618	1669	1594	1581	1507	1643	1611	1684	1820	2025	2018	2092	1968	1883	1919	1931	1950	2105	2423
0.1245	0.08	165	186	239	294	297	376	445	460	522	541	595	545	618	669	732	696	872	862	1093	1031	1031	1047	1069	1108	1196	1190	1277	1488	1665	1680	1616	1597	1552	1499	1565	1644	1614	1755	1941	2034	1998	1966	1834	1814	1902	1945	2074	2369
0.124	0.101	750	845	886	987	1031	1227	1279	1470	1547	1514	1481	1555	1673	1686	1771	1853	1919	2123	2255	2256	2339	2355	2309	2385	2503	2694	2762	2817	3112	3001	2918	2835	2639	2645	2628	2607	2551	2570	2698	2813	2672	2636	2429	2423	2407	2525	2570	2724
0.3783	0.462	221	310	316	392	452	514	580	596	775	797	769	788	850	857	980	1013	1207	1247	1405	1502	1446	1392	1388	1521	1570	1665	1823	1911	2070	2123	2153	2137	2128	2062	2049	2137	2180	2342	2607	2663	2624	2560	2491	2316	2358	2483	2747	2987
0.2449	0.468	369	419	423	464	569	629	718	804	924	921	888	932	966	990	1020	1080	1228	1350	1484	1665	1595	1537	1525	1457	1485	1564	1645	1802	2059	2251	2131	2016	2053	1959	1857	1924	1951	2036	2247	2477	2466	2265	2070	2187	2148	2239	2336	2489
0.1589	0.403	245	288	333	389	441	427	573	611	698	755	731	726	851	860	869	969	1059	1226	1437	1584	1458	1461	1497	1376	1485	1572	1689	1910	2194	2482	2553	2432	2247	2421	2331	2249	2342	2586	2889	3307	3248	3183	3056	2802	2852	2991	3138	3407
0.03	NA	2048	2323	2717	2972	3046	3462	3707	4184	4394	4539	4514	4356	4437	4644	4878	4965	5393	5916	6316	6617	6306	6307	6284	6503	6592	6844	7104	7494	7462	7519	7267	6812	6283	5979	5718	5489	5390	5449	5714	5887	5546	5130	4942	4696	4827	4752	4859	5354
0.4692	0.425	375	398	429	484	584	635	721	763	808	852	926	902	969	985	974	1092	1140	1253	1401	1527	1398	1473	1478	1550	1542	1662	1775	2008	2052	2011	1969	1991	2017	1940	1904	1866	1891	1948	2142	2263	2177	2119	2051	2102	2084	2064	2222	2472
0.6258	0.595	420	474	590	659	746	849	921	1048	1163	1241	1154	1190	1279	1400	1461	1594	1725	1880	1943	2053	2081	1958	2078	2132	2169	2261	2617	2763	3034	3138	3074	2781	2662	2495	2453	2513	2431	2551	2656	2786	2728	2524	2339	2402	2363	2437	2481	2940
0.1199	0.138	1289	1381	1628	1856	1979	2264	2612	2951	3250	3232	3254	3060	3187	3163	3521	3581	3882	4375	4672	4902	4820	4740	4850	5114	5200	5422	5450	5647	6099	5760	5546	5265	4875	4655	4498	4508	4390	4451	4699	4797	4509	4092	3887	3775	3749	3695	3918	4345
0.03	NA	542	630	704	702	838	1005	1131	1251	1351	1399	1330	1334	1307	1384	1421	1591	1676	1794	2003	2125	2134	1960	1880	1998	1988	2106	2195	2493	2688	2825	2691	2487	2254	2313	2211	2174	2171	2381	2728	2803	2762	2517	2297	2314	2355	2350	2501	2774
0.393	0.701	850	935	1009	1201	1296	1551	1746	2120	2278	2430	2234	2345	2377	2384	2572	2849	3076	3645	4407	4596	4423	4199	4003	4027	4034	4219	4486	4900	5646	5912	5856	5583	5046	4851	4922	4848	4716	5057	5738	6400	6399	5931	5801	5568	5338	5317	5476	5867
0.3577	0.72	2309	2615	2971	3353	3931	4527	5367	6345	6977	7213	7158	7270	7431	7759	8370	8918	9957	11370	12644	12960	12054	11420	10969	10875	11135	11420	12277	13385	14683	15166	14550	13487	12472	11838	11502	11566	11535	12350	13396	14153	13637	12922	11751	11580	10964	10969	11390	11764
0.1772	0.232	1272	1439	1715	1927	2185	2468	2955	3363	3601	3829	3878	3886	3990	4219	4650	4888	5348	5836	6263	6572	6067	6033	5866	6104	6294	6540	7067	7601	8127	8365	7816	7342	7028	6789	6975	7136	7163	7726	8095	7873	7400	6883	6734	6646	6548	6605	6627	7078
0.2779	0.38	1590	1847	2085	2506	2729	3410	4256	5027	5520	5643	5553	5525	5677	5965	6212	6489	7521	9101	10157	10276	9135	8152	7612	7107	7244	7520	7813	9012	10236	10179	9637	8537	7591	7102	6563	6345	6293	6530	7451	8158	7950	7069	6530	6110	6091	5791	6112	6714
0.3346	0.021	559	685	776	925	1011	1136	1388	1609	1680	1915	1753	1814	1786	1913	2119	2299	2477	2755	3124	3299	3178	2984	2917	2907	3106	3202	3487	3974	4220	4402	4312	4097	3757	3609	3566	3698	3736	3983	4247	4421	4300	3947	3808	3502	3618	3634	3995	4429
0.1741	0.254	41	41	64	71	84	84	108	150	172	170	150	170	145	168	215	239	270	330	404	470	353	383	318	386	365	422	510	587	686	695	679	626	579	576	589	603	654	743	963	1060	1132	970	948	786	831	927	1019	1318
0.09897	0.069	611	763	786	914	1008	1135	1262	1536	1638	1665	1718	1674	1710	1826	1965	1997	2185	2407	2664	2762	2786	2605	2654	2623	2837	3021	3163	3393	3719	3702	3706	3419	3233	3058	2910	2931	3103	3140	3499	3643	3466	3261	2945	2727	2822	2779	2861	3289
0.03	NA	840	884	1073	1075	1273	1475	1608	1795	1913	2034	2048	1961	2023	2125	2247	2373	2629	2905	3379	3474	3413	3438	3465	3626	3707	3893	4094	4353	4703	4682	4532	4243	4032	3818	3703	3686	3601	3842	4368	4389	4368	4002	3772	3551	3584	3772	3920	4505
0.03	NA	527	562	616	684	762	959	1095	1185	1337	1302	1305	1328	1402	1536	1582	1759	1879	2151	2381	2664	2446	2345	2357	2362	2541	2718	2877	3371	3528	3700	3580	3386	3146	3026	2913	3008	3052	3458	3958	3953	3997	3546	3330	3365	3396	3574	3732	4332
0.03	NA	295	357	393	479	556	589	625	727	783	878	850	846	915	945	1016	1028	1114	1255	1399	1463	1428	1381	1494	1511	1666	1680	1845	1891	2093	2076	2043	2003	1905	1963	1891	1820	1899	1935	1991	2140	2102	1973	1945	1907	1913	1942	1966	2148
0.03	NA	2057	2297	2421	2633	2835	3173	3441	3693	3898	3881	3876	3795	3928	4194	4179	4440	4669	4851	5240	5422	5009	4945	4843	4904	4971	5050	5252	5479	5707	5732	5508	5098	4875	4659	4686	4447	4560	4777	5022	5210	4941	4509	4429	4225	4199	4274	4632	4848
0.09669	0.145	626	677	746	866	981	1111	1225	1405	1494	1602	1562	1497	1577	1744	1821	1965	2055	2192	2429	2429	2407	2410	2370	2430	2435	2555	2838	2976	3131	3247	3027	2880	2753	2687	2731	2706	2750	2821	3004	3258	3095	2841	2704	2590	2618	2763	2810	3103
0.03	NA	997	1027	1264	1415	1540	1657	1787	2026	2278	2315	2302	2207	2373	2519	2567	2764	2854	3005	3279	3313	3123	3069	2903	2971	3171	3399	3337	3538	3796	3782	3672	3314	3395	3278	3177	3139	3110	3425	3517	3637	3447	3205	3033	3003	2951	3069	3232	3590
0.03	NA	464	533	676	717	804	878	951	1150	1133	1259	1239	1296	1309	1371	1522	1395	1529	1713	1811	2001	1768	1751	1732	1825	1906	1953	2071	2205	2305	2340	2355	2214	2193	2091	2063	2035	2023	2065	2334	2359	2234	2163	1946	1927	2000	2042	2072	2259
0.03	NA	1699	1887	2010	2246	2328	2745	2952	3338	3410	3512	3485	3507	3589	3795	3815	4086	4406	4764	5099	5204	5171	4936	4847	4930	5036	5257	5524	5850	6191	6378	5977	5704	5567	5239	5090	4952	4809	5029	5369	5488	5294	5108	4867	4660	4679	4812	4670	5136
0.0595	0.133	587	692	724	873	995	1133	1243	1430	1483	1521	1561	1567	1628	1673	1742	1921	1991	2339	2532	2542	2583	2314	2420	2572	2669	2794	2947	3169	3512	3453	3411	3246	3156	2976	2891	2781	2890	2947	3202	3284	3341	2943	2808	2741	2783	2904	3060	3205
0.03	NA	741	842	830	982	1056	1287	1348	1529	1754	1697	1794	1800	1957	2046	2167	2276	2468	2683	2980	3262	3300	3279	3295	3404	3715	3807	3939	4446	4606	4714	4494	4363	4093	4052	3908	3699	3650	3816	3980	4150	3973	3689	3665	3565	3548	3614	3647	3947
0.03	NA	517	581	605	764	813	947	1096	1217	1299	1358	1336	1315	1416	1542	1564	1801	1899	2093	2355	2601	2451	2298	2351	2473	2486	2647	2902	3273	3481	3672	3468	3290	3147	2994	2937	3048	2984	3317	3468	3620	3634	3418	3093	3156	3067	3339	3480	3754
0.03	NA	926	1109	1235	1457	1531	1841	2072	2449	2609	2694	2636	2660	2759	2843	2959	3130	3351	3754	4006	4022	4198	3980	3972	3966	4227	4192	4500	4727	5229	5148	5142	4901	4645	4607	4556	4204	4299	4467	4575	4806	4730	4780	4426	4283	4278	4330	4526	4720
0.05085	0.047	1821	2008	2289	2420	2654	2974	3347	3755	4158	4158	4110	4137	4331	4487	4689	5133	5384	5980	6582	6690	6316	5960	5919	6114	6259	6733	7103	7593	8372	8556	7966	7428	6965	6707	6411	6467	6490	6740	7178	7382	7050	6689	6205	6119	6106	6120	6406	7100
0.1174	NA	762	938	1073	1227	1211	1448	1650	1744	1941	1949	1911	1906	1964	2026	2153	2352	2446	2674	3017	3181	3244	3211	3239	3395	3580	3538	3695	3792	3852	3937	3672	3566	3316	3308	3111	3255	3140	3216	3475	3247	3307	3000	2921	2948	2980	2969	3098	3299
[truncated: 623 more columns]

## Sheet: capture
Fragment length counts from capture data
30	31	32	33	34	35	36	37	38	39	40	41	42	43	44	45	46	47	48	49	50	51	52	53	54	55	56	57	58	59	60	61	62	63	64	65	66	67	68	69	70	71	72	73	74	75	76	77	78	79
55	77	77	99	139	157	198	271	323	355	375	418	535	645	680	726	865	1037	1210	1268	1220	1332	1388	1425	1589	1798	1817	2085	2140	2188	2176	2071	1939	1905	1938	1900	2024	2051	2154	2360	2209	2152	1991	1945	2017	2001	2181	2452	2831	3040
20	20	18	26	26	47	50	69	70	100	116	115	135	115	141	173	206	236	298	307	272	276	341	364	361	368	468	522	556	566	617	582	518	542	616	574	561	670	684	729	762	704	676	677	714	760	749	865	1062	1173
126	153	161	194	206	241	283	296	386	379	410	425	410	443	544	497	609	688	850	836	884	825	826	891	946	1042	1109	1233	1366	1536	1526	1510	1400	1461	1364	1411	1440	1561	1715	1791	1757	1818	1760	1704	1828	1853	1995	2154	2367	2762
24	16	24	48	37	42	62	68	78	90	96	103	155	157	211	215	265	294	362	390	391	389	438	505	523	563	650	690	824	791	854	848	890	906	910	867	895	900	1086	1131	1164	1268	1182	1152	1131	1195	1266	1376	1602	1636
19	27	34	47	58	78	110	130	152	201	243	263	318	335	414	491	556	711	876	985	952	1027	1166	1240	1356	1566	1620	1737	1865	1880	1986	1875	1858	1778	1776	1704	1697	1704	1913	1937	1916	1885	1776	1754	1791	1745	1913	1947	2313	2545
22	28	34	55	64	77	93	123	131	172	205	176	225	260	328	352	408	454	564	635	628	702	767	854	893	961	1080	1083	1157	1121	1168	1182	1091	1108	1089	1058	1085	1048	1108	1187	1147	1191	1146	1115	1099	1152	1166	1255	1300	1285
26	36	47	58	73	86	116	148	206	201	245	286	344	377	437	526	610	719	965	1085	920	957	986	1019	1093	1250	1409	1625	1809	1904	1905	1801	1730	1809	1880	1907	2071	2308	2532	2810	2949	2660	2574	2372	2481	2591	2790	3113	3707	4208
16	19	23	33	36	60	67	80	106	124	109	154	131	187	190	234	290	330	378	428	397	448	446	474	485	548	628	745	790	835	920	868	867	770	741	830	852	892	990	1027	1045	1021	1034	1043	1041	981	1091	1232	1483	1591
21	20	45	43	68	62	108	125	174	161	178	222	225	238	248	342	407	501	623	688	633	655	683	715	850	927	936	1043	1172	1243	1198	1201	1172	1161	1224	1145	1190	1267	1351	1463	1509	1396	1417	1318	1348	1360	1439	1595	1867	2069
12	15	14	26	15	35	35	50	70	79	99	108	119	129	170	177	221	345	417	444	438	400	464	434	498	561	617	758	831	977	939	939	1008	952	1044	973	965	1062	1224	1383	1509	1387	1297	1319	1368	1390	1443	1588	1870	2276
32	47	42	57	61	69	92	115	137	163	182	202	205	267	284	358	396	511	592	668	575	582	668	644	704	809	921	992	1099	1132	1178	1169	1143	1143	1116	1080	1167	1287	1363	1417	1440	1354	1340	1260	1249	1399	1423	1686	1960	2219
34	51	45	61	72	90	119	195	187	219	258	284	301	429	440	456	577	697	783	925	836	899	956	1016	1096	1193	1376	1557	1749	1752	1712	1658	1687	1675	1658	1681	1790	1880	2038	2217	2211	2033	2002	2006	2057	2058	2240	2561	2982	3332
29	30	30	42	21	46	52	57	45	67	69	78	86	110	106	143	196	225	231	288	238	230	280	300	332	328	408	497	548	609	602	604	618	598	630	570	586	694	759	861	822	785	813	804	793	779	928	1021	1227	1380
23	23	30	34	39	59	70	81	103	109	112	115	124	147	163	211	214	278	382	435	416	428	434	453	481	569	602	692	867	938	1027	989	1028	996	1089	1109	1174	1343	1490	1814	1806	1935	1921	1863	1968	2039	2152	2369	2607	3066
35	45	47	75	88	104	127	155	167	212	212	263	264	317	360	384	450	511	580	626	592	607	705	772	819	817	986	1007	1148	1168	1160	1101	1124	1161	1125	1043	1052	1113	1189	1246	1218	1262	1122	1172	1118	1189	1193	1357	1502	1640
17	16	42	34	46	72	68	81	112	141	117	165	148	208	223	254	288	340	390	435	421	454	460	463	496	557	610	672	793	775	847	725	798	736	744	689	688	705	762	805	830	840	791	788	786	831	816	877	953	1047
11	13	38	36	55	84	93	110	161	165	213	231	283	318	378	470	563	690	891	1013	938	956	1021	1019	1003	1097	1325	1573	1783	1931	1982	1921	1788	1848	1799	1795	1875	2025	2233	2544	2493	2599	2551	2498	2430	2374	2454	2542	2830	3242
13	11	11	15	22	20	26	31	32	40	53	47	52	60	85	101	99	129	157	180	165	155	170	177	199	224	252	283	367	351	355	392	374	403	366	409	447	454	528	605	601	544	546	569	609	614	657	704	865	1028
54	42	59	63	68	101	133	130	155	172	205	201	277	307	339	412	475	521	614	641	670	715	749	824	863	974	1050	1130	1235	1227	1224	1193	1173	1152	1141	1155	1190	1254	1334	1300	1386	1157	1310	1254	1242	1219	1399	1471	1641	1785
12	10	18	17	28	32	42	59	90	99	105	110	124	148	189	219	249	337	378	441	461	475	553	554	606	682	721	782	809	837	857	787	816	745	738	734	739	818	827	876	889	840	825	816	856	830	901	991	1131	1258
38	27	43	36	50	56	67	79	108	95	134	147	198	216	231	258	310	376	421	491	444	457	520	503	554	596	663	760	873	886	940	915	836	960	926	908	1018	999	1215	1343	1370	1287	1276	1263	1321	1424	1387	1546	1828	2147
32	30	39	59	53	58	60	82	103	104	130	116	119	173	194	196	277	266	296	349	317	330	367	428	456	439	499	559	628	628	653	620	607	611	650	592	623	654	707	741	769	738	779	734	750	760	785	907	1139	1235
114	133	148	177	167	226	219	254	263	286	285	297	343	364	348	395	481	534	616	590	651	685	685	672	730	753	840	898	1039	1050	1103	1060	1030	1074	1011	1098	1116	1157	1204	1302	1297	1343	1292	1282	1305	1292	1405	1491	1774	1979
23	34	29	63	62	75	106	120	157	198	205	231	252	271	320	352	416	531	663	685	645	745	718	857	894	918	973	1086	1139	1090	1143	1072	1072	1043	1028	1001	988	936	1157	1178	1154	1075	1076	1051	1087	1142	1126	1262	1497	1641
28	27	36	17	36	38	55	60	72	57	79	88	101	101	128	155	156	201	197	238	230	232	275	308	320	341	430	482	510	533	566	546	559	540	529	558	559	591	717	756	753	734	663	673	682	716	856	947	1129	1337
27	39	20	33	18	11	17	39	34	41	27	40	39	54	55	44	59	78	110	136	113	113	140	128	145	162	170	206	225	252	287	254	308	290	302	319	365	369	420	492	481	485	477	504	528	499	601	681	855	1031
78	69	73	95	112	104	118	163	187	170	189	199	192	236	238	248	304	325	388	422	418	424	397	453	469	502	572	633	711	752	788	807	815	738	780	793	795	900	1015	1148	1165	1038	1019	1044	1158	1172	1220	1523	1725	2013
14	26	19	24	31	25	44	36	52	40	57	61	60	71	75	106	132	139	177	199	174	185	233	213	244	258	302	309	417	396	412	434	379	420	430	428	446	493	567	634	625	615	614	644	642	713	739	846	1047	1147
13	8	17	22	17	28	29	54	57	57	78	77	78	105	113	149	198	234	277	316	291	355	377	401	413	456	513	595	694	731	809	714	798	740	747	838	762	799	880	940	990	996	1025	952	972	997	1079	1143	1225	1403
22	15	26	20	23	29	37	32	44	53	50	45	65	60	84	90	106	127	158	182	152	186	212	217	251	241	287	322	392	371	408	393	392	377	365	391	401	445	489	508	487	500	521	496	545	566	558	648	719	797
22	9	21	24	32	43	45	63	52	92	95	113	134	117	179	201	225	287	329	372	351	374	400	457	581	574	583	682	788	802	846	802	769	807	820	789	847	921	1021	993	1050	977	986	1024	1019	971	1107	1257	1447	1641
49	79	91	99	136	164	209	279	331	394	402	494	464	597	643	712	890	975	1090	1248	1147	1264	1313	1433	1418	1568	1686	1953	1908	1937	1907	1806	1693	1695	1583	1611	1635	1685	1720	1798	1768	1665	1647	1595	1660	1559	1707	1864	2101	2280
19	28	30	36	47	65	91	116	139	177	148	189	208	240	292	340	356	436	461	607	514	572	631	680	728	769	878	994	1060	1113	1094	1079	1027	1041	1010	983	1056	1070	1136	1225	1210	1218	1205	1114	1232	1239	1265	1414	1542	1813
9	20	25	38	45	45	56	90	93	102	124	112	144	146	172	181	231	284	306	354	323	338	345	393	404	471	512	550	645	653	661	615	664	608	627	646	618	669	791	789	809	793	830	783	780	815	871	929	1122	1229
8	13	25	22	32	35	40	51	50	76	86	103	87	130	144	180	193	235	247	285	270	287	333	351	373	432	453	518	612	629	648	684	595	655	659	641	717	754	830	825	883	887	772	904	861	903	962	1054	1321	1453
28	38	67	64	93	120	162	194	247	301	325	333	425	400	500	682	708	894	1050	1222	1145	1332	1407	1514	1620	1817	1938	2006	2203	2202	2244	2100	2087	2079	2002	1897	1888	2058	2119	2298	2253	2088	2165	1997	2059	2147	2287	2469	2742	3166
12	19	16	20	42	40	60	64	76	95	84	111	125	128	170	208	225	243	347	376	355	385	408	445	493	560	639	688	739	796	806	820	811	817	839	859	853	897	956	1045	1039	1107	1050	1005	1078	1037	1144	1149	1380	1457
29	27	27	44	46	47	55	63	70	81	102	86	119	120	119	133	175	197	229	251	255	242	273	347	302	329	371	403	486	460	501	472	438	498	452	421	507	543	605	626	634	563	591	546	622	622	638	741	877	1040
16	13	27	24	46	42	37	55	73	86	69	70	100	135	108	145	169	189	192	271	246	208	241	221	269	303	338	324	408	410	419	429	394	375	392	392	391	463	557	536	505	481	528	537	539	541	586	605	822	845
13	14	18	23	33	24	36	40	61	71	80	87	105	140	125	155	191	245	266	302	288	330	314	343	376	418	477	573	618	597	637	623	628	655	593	639	651	704	778	836	866	817	774	779	857	931	914	1055	1302	1427
38	41	31	68	67	83	108	116	147	140	169	204	199	217	269	305	369	429	469	565	477	536	601	582	738	793	785	963	1065	1173	1236	1328	1324	1393	1464	1560	1602	1723	1943	2132	2216	2351	2518	2499	2846	2927	3034	3221	3418	3690
17	29	29	22	30	47	62	68	77	90	100	101	129	151	200	204	230	328	389	424	362	426	462	479	505	547	618	729	793	830	930	892	918	989	963	975	984	1005	1131	1178	1114	1195	1143	1194	1130	1166	1256	1347	1512	1718
13	15	17	15	23	27	22	26	34	48	55	54	49	55	53	57	90	92	112	125	136	146	120	138	152	186	208	237	268	267	298	301	265	300	303	341	318	362	445	407	478	449	442	443	456	475	503	572	635	765
92	101	98	107	116	173	166	199	214	230	227	234	250	289	307	297	357	380	404	443	409	416	389	485	452	480	575	590	629	649	688	617	628	652	677	653	658	712	748	779	817	711	730	731	713	795	827	940	1083	1217
22	29	24	37	44	53	47	54	75	86	88	85	110	124	150	146	170	203	222	247	216	236	271	290	327	322	429	460	494	514	529	518	540	543	543	528	552	597	639	676	716	718	665	695	725	739	740	894	905	976
41	38	44	57	70	81	97	122	115	153	148	193	184	220	226	266	333	392	419	470	442	503	494	572	588	670	737	832	944	894	910	953	879	943	921	931	948	1028	1117	1205	1132	1127	1123	1076	1133	1220	1317	1380	1704	1899
15	6	21	6	20	22	30	43	48	57	60	78	75	93	128	131	159	212	235	265	247	261	271	315	316	354	403	466	548	584	594	607	655	602	609	629	620	663	756	842	813	821	799	814	807	883	928	1014	1126	1197
34	31	44	43	43	52	70	69	103	117	128	174	157	193	210	259	272	320	407	460	442	467	518	516	576	632	711	847	866	984	981	973	934	1016	992	1022	1011	1138	1291	1372	1335	1369	1303	1299	1303	1341	1365	1542	1705	1947
18	14	14	17	17	37	36	55	56	62	80	89	99	93	123	130	145	197	224	253	239	284	265	325	389	362	404	439	534	563	565	626	561	569	609	581	584	597	722	730	737	736	757	740	790	775	875	885	1030	1167
7	11	16	15	25	28	24	32	38	45	65	58	60	77	75	89	109	139	132	180	146	166	198	230	207	233	260	302	331	426	418	440	373	454	412	432	422	462	525	559	569	538	588	570	574	624	587	738	826	896
22	13	21	32	36	50	73	90	113	127	127	149	171	219	256	267	321	380	470	489	468	488	527	569	673	708	787	867	898	933	1002	965	934	889	850	954	925	934	1031	1067	1116	1094	1024	948	1052	1046	1122	1322	1480	1584
33	31	45	49	53	62	75	92	112	149	148	177	183	203	242	243	309	376	443	471	463	529	512	565	580	720	748	860	911	988	966	874	918	945	854	894	918	920	1064	1208	1131	1086	1091	1038	1076	1112	1158	1242	1633	1736
24	23	44	37	52	57	82	111	142	120	158	176	174	231	244	306	322	413	492	513	454	539	524	537	592	672	725	852	937	923	991	1015	980	1006	1012	931	1006	1086	1184	1199	1266	1192	1168	1190	1166	1188	1239	1405	1652	1800
36	61	72	71	86	81	153	129	176	203	205	229	251	310	340	318	399	463	594	564	564	546	592	672	703	723	794	791	962	934	920	902	874	785	854	816	814	880	906	978	965	937	867	860	871	925	957	1062	1184	1375
30	41	54	87	78	85	115	119	146	174	213	223	274	280	330	423	450	530	562	598	601	666	638	723	848	832	961	905	1034	1038	1033	1044	964	930	1021	982	979	1014	1045	1069	1019	1072	1019	949	995	993	1180	1117	1285	1480
22	18	37	41	44	45	47	75	80	93	104	117	125	116	148	167	189	231	250	314	271	312	287	328	360	376	399	390	516	585	524	547	519	535	522	524	541	590	636	660	727	654	647	650	647	660	717	828	872	1028
19	44	27	49	56	79	87	111	128	140	151	204	224	231	266	348	394	458	589	617	573	636	695	720	816	855	1030	1026	1199	1294	1284	1252	1242	1266	1303	1415	1403	1517	1638	1784	1892	1912	1885	1879	1820	1925	1842	2205	2401	2686
4	19	13	27	22	24	32	43	41	50	56	65	93	98	103	131	147	146	144	210	195	192	243	267	254	285	318	346	401	414	435	414	434	432	441	457	446	475	533	546	615	499	531	510	573	596	619	607	717	779
21	25	24	40	47	48	68	81	93	130	132	160	154	184	178	267	265	297	358	401	345	382	418	453	495	519	565	661	695	766	749	783	770	789	753	831	806	820	940	977	955	1001	968	901	932	985	977	1155	1247	1296
27	31	24	31	41	47	75	86	107	112	121	155	153	162	211	234	268	316	406	440	404	424	433	515	537	585	625	702	755	845	904	958	894	892	935	984	926	961	1142	1217	1326	1260	1262	1257	1244	1285	1390	1466	1771	1951
16	23	23	18	31	42	41	52	90	90	98	94	97	126	122	153	173	207	257	297	243	285	307	339	355	414	426	495	520	560	553	527	520	521	511	561	554	609	632	649	681	642	675	651	639	718	718	844	956	1043
13	20	12	19	14	30	18	30	49	36	51	55	62	66	81	98	99	111	175	194	146	139	189	153	203	217	259	268	330	362	371	380	343	360	420	382	416	474	495	547	569	563	572	565	629	585	647	763	907	1054
25	26	37	32	44	57	80	100	114	131	141	161	168	199	235	249	336	360	405	463	429	480	537	544	550	674	765	768	870	886	937	985	938	941	918	894	965	1027	1027	1209	1174	1088	1149	1080	1125	1150	1170	1284	1399	1564
24	30	45	59	87	94	130	170	198	229	272	293	361	420	488	567	593	779	906	1026	928	1058	1139	1200	1382	1422	1528	1637	1821	1876	1794	1742	1695	1633	1650	1499	1522	1582	1698	1639	1644	1692	1513	1464	1500	1578	1590	1774	1949	2147
10	20	31	40	58	55	97	109	142	186	182	205	227	279	296	332	377	419	527	601	559	528	567	683	676	787	902	937	1037	1095	1034	1103	1044	1028	1021	1039	1091	1117	1234	1253	1306	1148	1158	1161	1085	1130	1255	1356	1521	1680
15	21	14	28	37	49	53	60	102	103	134	138	174	177	227	281	316	367	466	540	527	627	604	699	743	854	962	1090	1098	1157	1215	1164	1102	1057	1088	1101	1147	1243	1365	1445	1473	1400	1394	1407	1399	1475	1546	1723	2107	2447
35	32	50	69	97	96	137	194	198	246	274	295	318	396	434	541	643	684	827	863	888	915	1064	1105	1211	1359	1413	1597	1694	1701	1777	1616	1607	1583	1526	1609	1582	1591	1661	1650	1729	1613	1538	1512	1549	1526	1544	1642	1776	2010
23	40	43	55	57	84	120	162	172	211	193	242	274	265	365	431	447	546	648	687	691	690	703	755	801	910	982	1044	1178	1197	1095	1095	1115	1017	1012	1062	1024	1068	1059	1207	1166	1128	1080	1000	1072	1114	1083	1266	1339	1553
8	8	7	24	11	20	26	22	29	29	45	43	47	48	65	85	106	107	130	161	145	159	160	172	187	203	252	235	294	317	343	335	337	354	326	370	370	406	445	462	469	477	516	498	479	506	565	574	733	793
20	30	25	40	46	53	73	68	117	101	101	126	141	171	158	220	214	264	345	334	385	374	392	444	466	515	588	630	668	696	663	696	676	712	719	693	750	710	770	775	845	804	825	799	851	793	873	931	1051	1108
51	46	69	81	99	105	107	136	156	147	183	158	197	196	209	248	256	336	342	372	365	367	382	397	443	451	465	571	605	667	573	669	656	635	648	672	724	780	790	830	948	817	870	809	872	897	964	1023	1220	1476
13	13	11	28	16	29	40	46	45	68	56	72	65	86	104	103	129	161	182	227	218	194	242	253	238	308	332	355	435	469	439	440	444	481	443	463	452	503	566	648	614	604	589	629	640	580	648	701	859	960
11	13	17	29	21	27	28	45	48	67	57	53	66	85	86	105	118	152	187	190	189	225	222	215	250	261	297	375	439	430	499	466	520	501	458	499	537	555	621	707	773	760	731	722	775	806	876	943	1072	1291
26	22	24	23	30	43	38	47	46	74	67	72	67	84	89	126	152	181	183	194	193	213	237	218	302	292	339	362	416	383	405	428	407	446	378	421	423	457	499	609	532	532	496	505	540	570	618	651	798	914
90	94	104	126	117	152	196	195	199	221	267	221	272	308	343	357	374	439	451	499	450	504	506	518	523	575	662	716	793	856	825	779	752	732	731	739	712	752	861	897	829	824	795	745	802	779	816	978	1143	1258
17	17	23	27	38	56	77	75	101	124	117	168	173	221	213	253	279	349	391	445	447	467	541	580	606	622	740	771	782	845	894	800	804	812	772	819	766	850	937	862	953	867	861	854	836	872	909	981	1116	1228
17	36	29	49	50	71	88	96	111	133	142	172	195	220	241	288	327	381	534	566	518	577	553	615	687	723	767	890	986	1110	1092	1059	1067	1136	1114	1085	1191	1223	1438	1503	1627	1533	1574	1471	1519	1486	1563	1722	1824	2158
24	45	33	58	68	82	135	177	218	259	281	324	386	384	507	560	681	822	981	1127	1024	1017	1040	1134	1312	1401	1473	1634	1873	2023	2013	1815	1908	1953	1941	1908	1934	2136	2376	2358	2442	2427	2401	2372	2263	2398	2464	2577	3044	3349
27	31	39	46	68	65	77	103	154	165	190	203	260	300	345	409	487	606	650	751	711	722	712	808	891	969	1146	1205	1382	1466	1395	1457	1407	1305	1496	1515	1648	1756	1807	1793	1718	1687	1630	1658	1648	1731	1755	1856	2098	2089
22	23	40	47	71	81	134	169	204	238	274	327	349	389	440	515	597	817	861	903	884	900	859	900	852	940	1002	1186	1334	1309	1306	1201	1149	1040	1068	941	908	1086	1163	1261	1247	1211	1153	1046	1088	961	1074	1177	1295	1590
18	13	17	27	30	36	45	68	79	99	128	134	128	175	182	232	267	277	353	467	396	430	389	452	478	524	612	731	800	872	846	837	850	827	791	846	811	861	1014	1100	1093	1020	949	904	960	1020	1051	1258	1413	1645
11	6	17	5	10	20	21	13	17	20	16	24	34	27	36	36	54	64	75	86	88	74	98	95	108	117	157	154	207	197	220	191	207	199	231	270	263	303	390	429	433	411	357	386	386	428	465	546	756	940
28	51	50	64	87	98	105	126	152	188	213	249	256	296	305	369	442	501	605	623	612	655	708	767	884	881	1001	1188	1194	1265	1252	1200	1200	1185	1170	1156	1188	1282	1379	1522	1471	1405	1314	1229	1351	1270	1414	1595	1822	1986
17	19	36	25	42	55	71	78	99	129	126	109	188	220	193	252	279	331	380	428	406	441	448	523	544	596	622	726	754	769	795	800	758	776	822	788	802	813	927	1032	925	941	924	837	933	899	1003	1067	1317	1461
26	18	27	21	40	42	63	60	79	97	108	98	129	154	180	217	242	256	356	368	372	387	385	431	492	581	605	672	732	814	723	772	761	743	725	734	757	874	871	921	943	932	860	880	873	956	976	1012	1246	1361
30	29	49	44	46	91	97	143	144	169	228	228	251	272	355	362	468	506	570	652	559	603	666	723	798	905	940	1041	1284	1212	1208	1200	1194	1200	1191	1184	1200	1278	1367	1493	1495	1412	1373	1354	1342	1445	1470	1620	1908	2130
[truncated: 621 more columns]
