# Supplementary figures and images for: Unsupervised detection of fragment length signatures of circulating tumor DNA using non-negative matrix factorization
Source: eLife journal article supplement (doi:10.7554/elife.71569), 2022-07-27

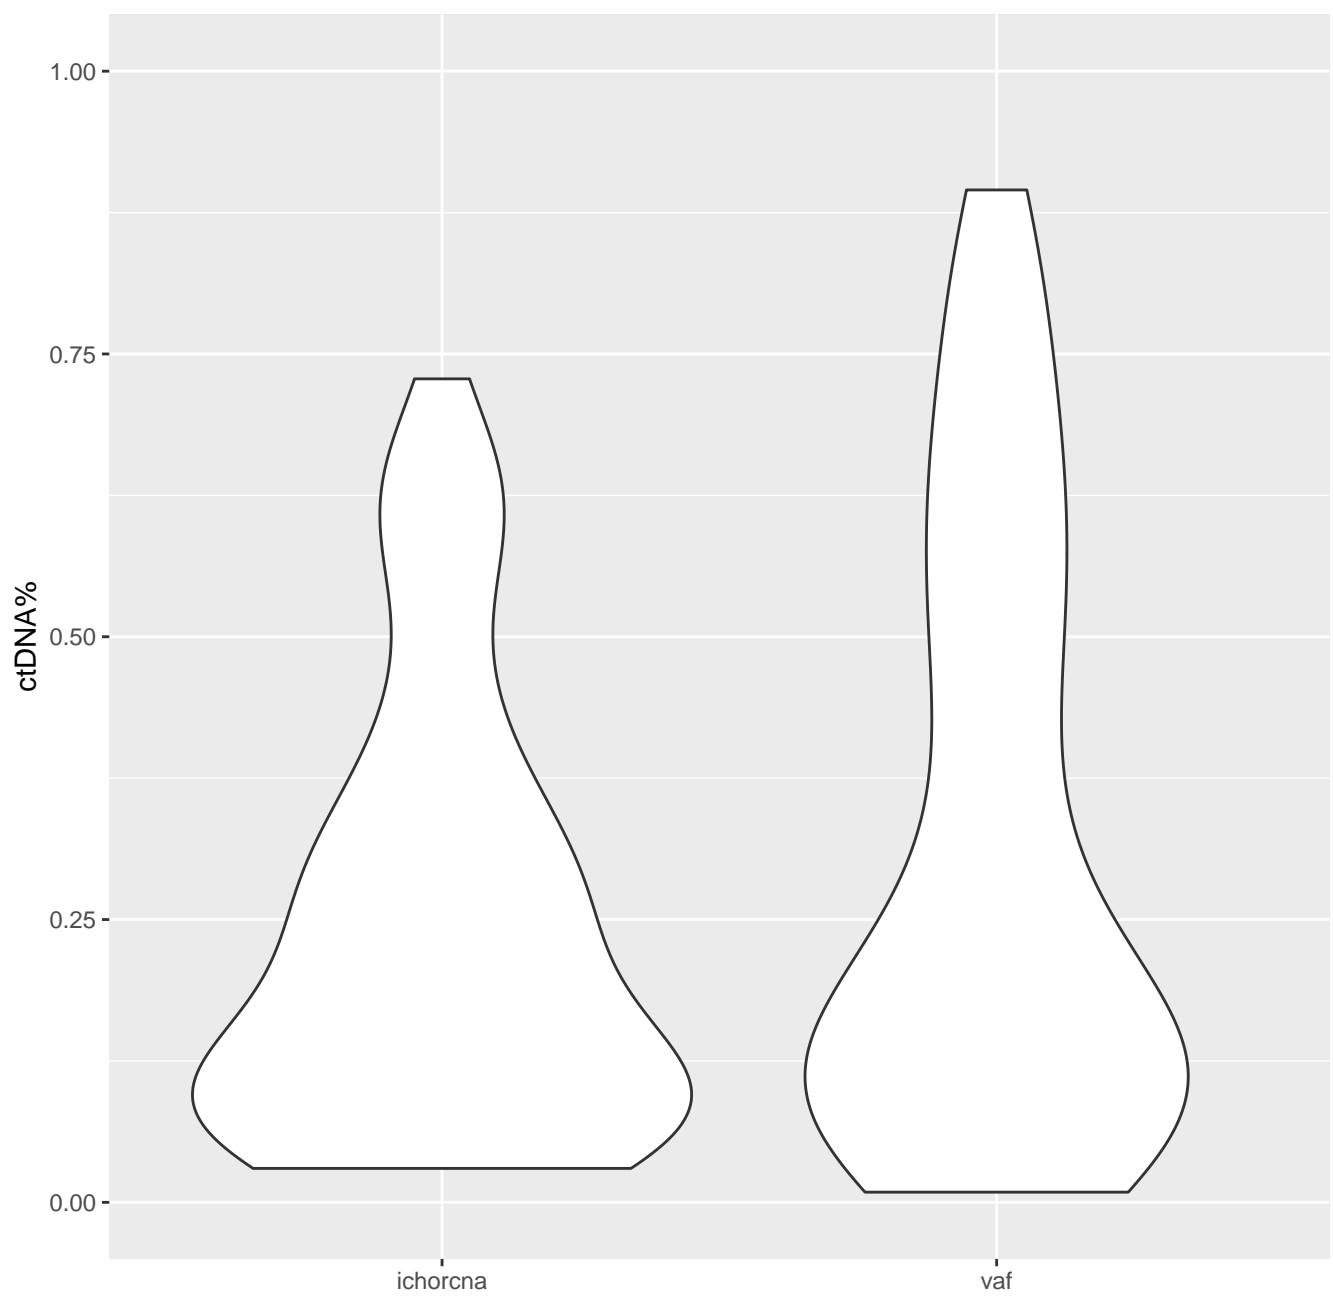

Supplement: supp [file elife-71569-supp-v1.zip]

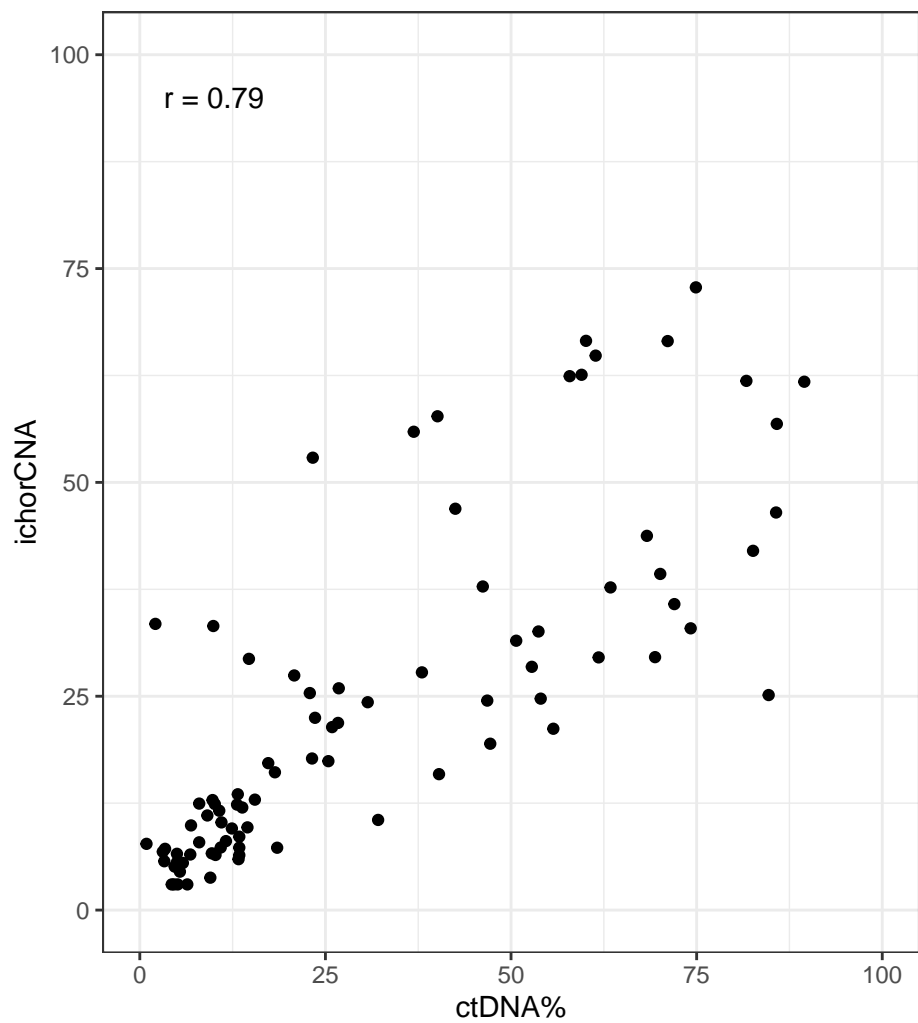

Supplement: supp [file elife-71569-supp-v1.zip]

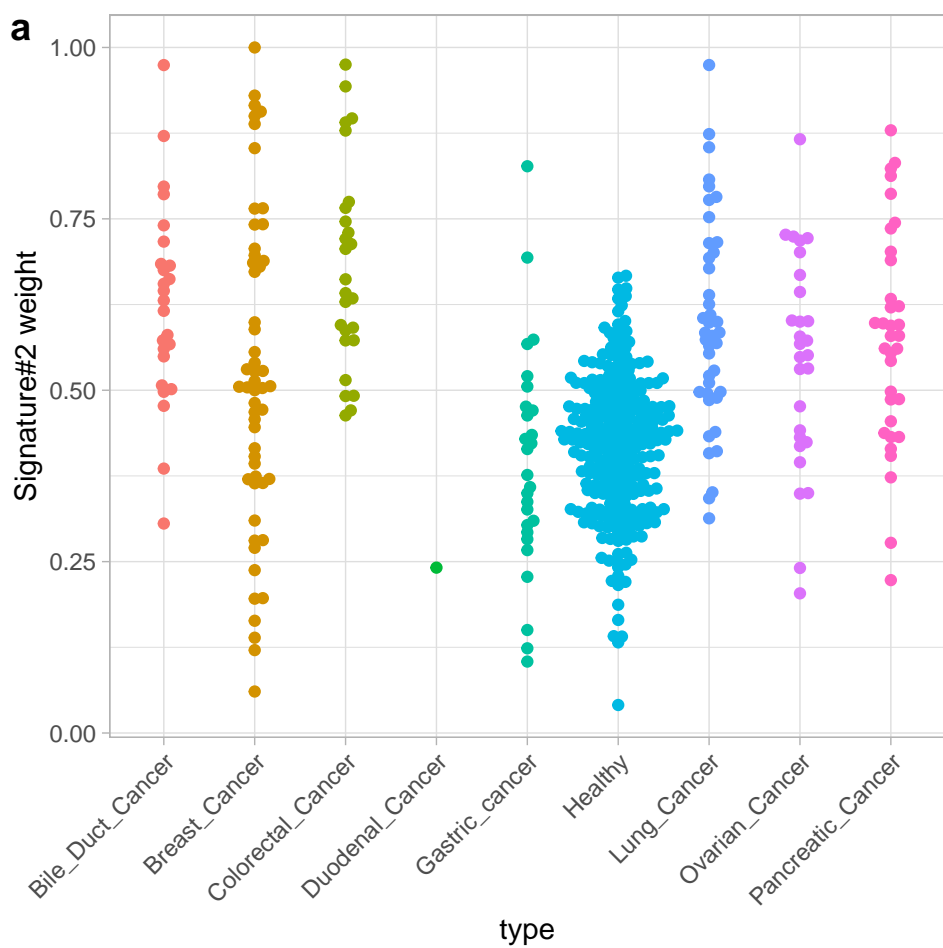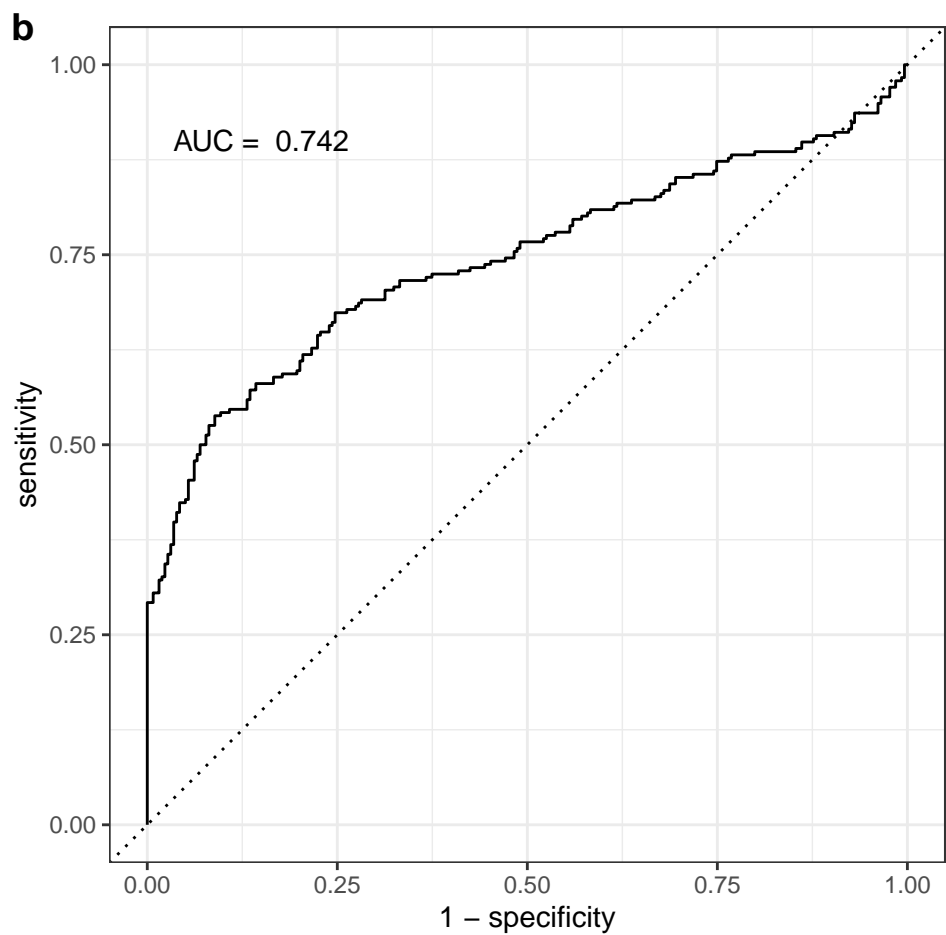

Supplement: supp [file elife-71569-supp-v1.zip]

Figure 2 overview

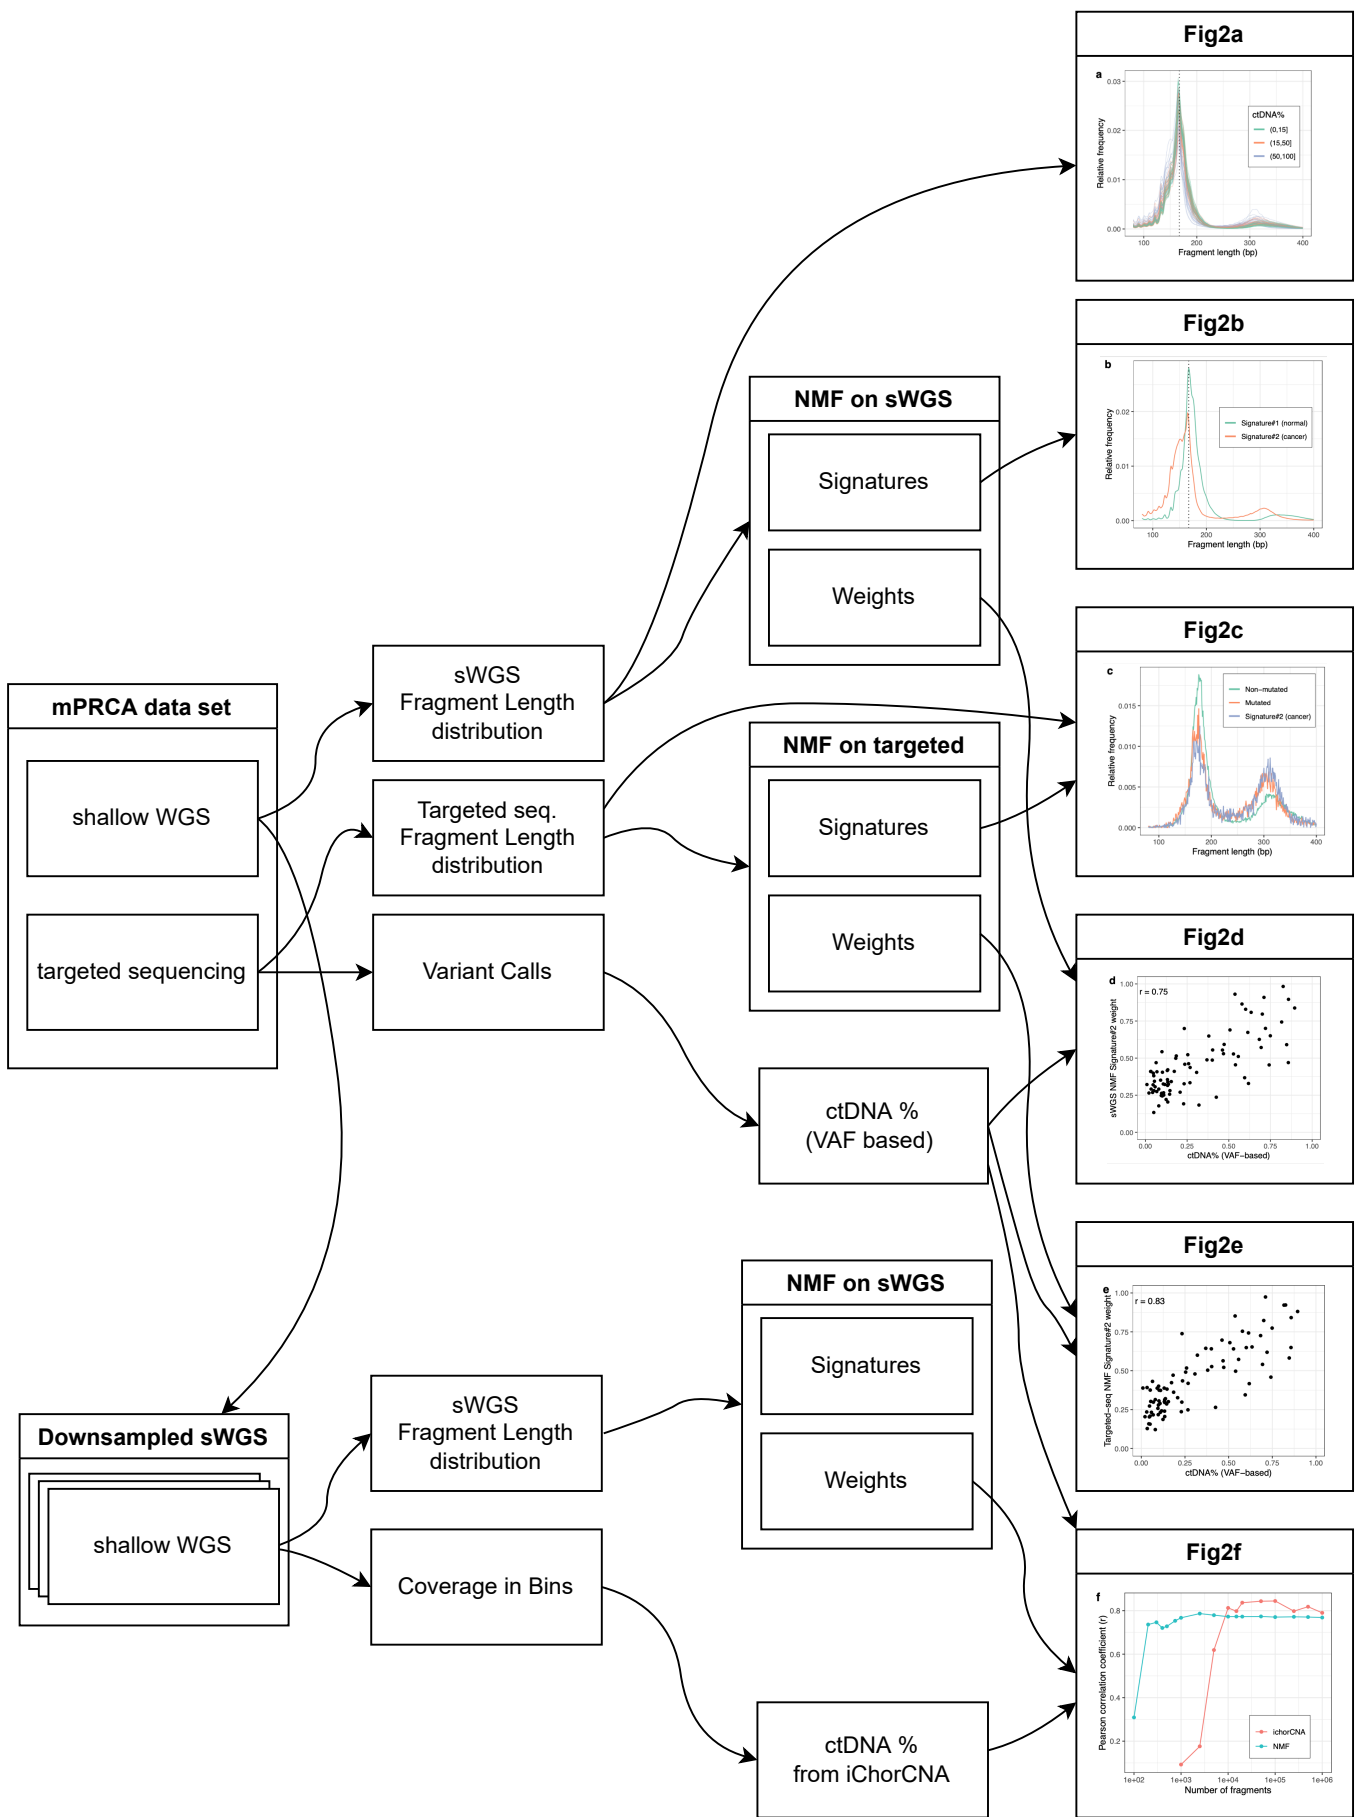

Supplement: supp [file elife-71569-supp-v1.zip]

Figure 3 overview

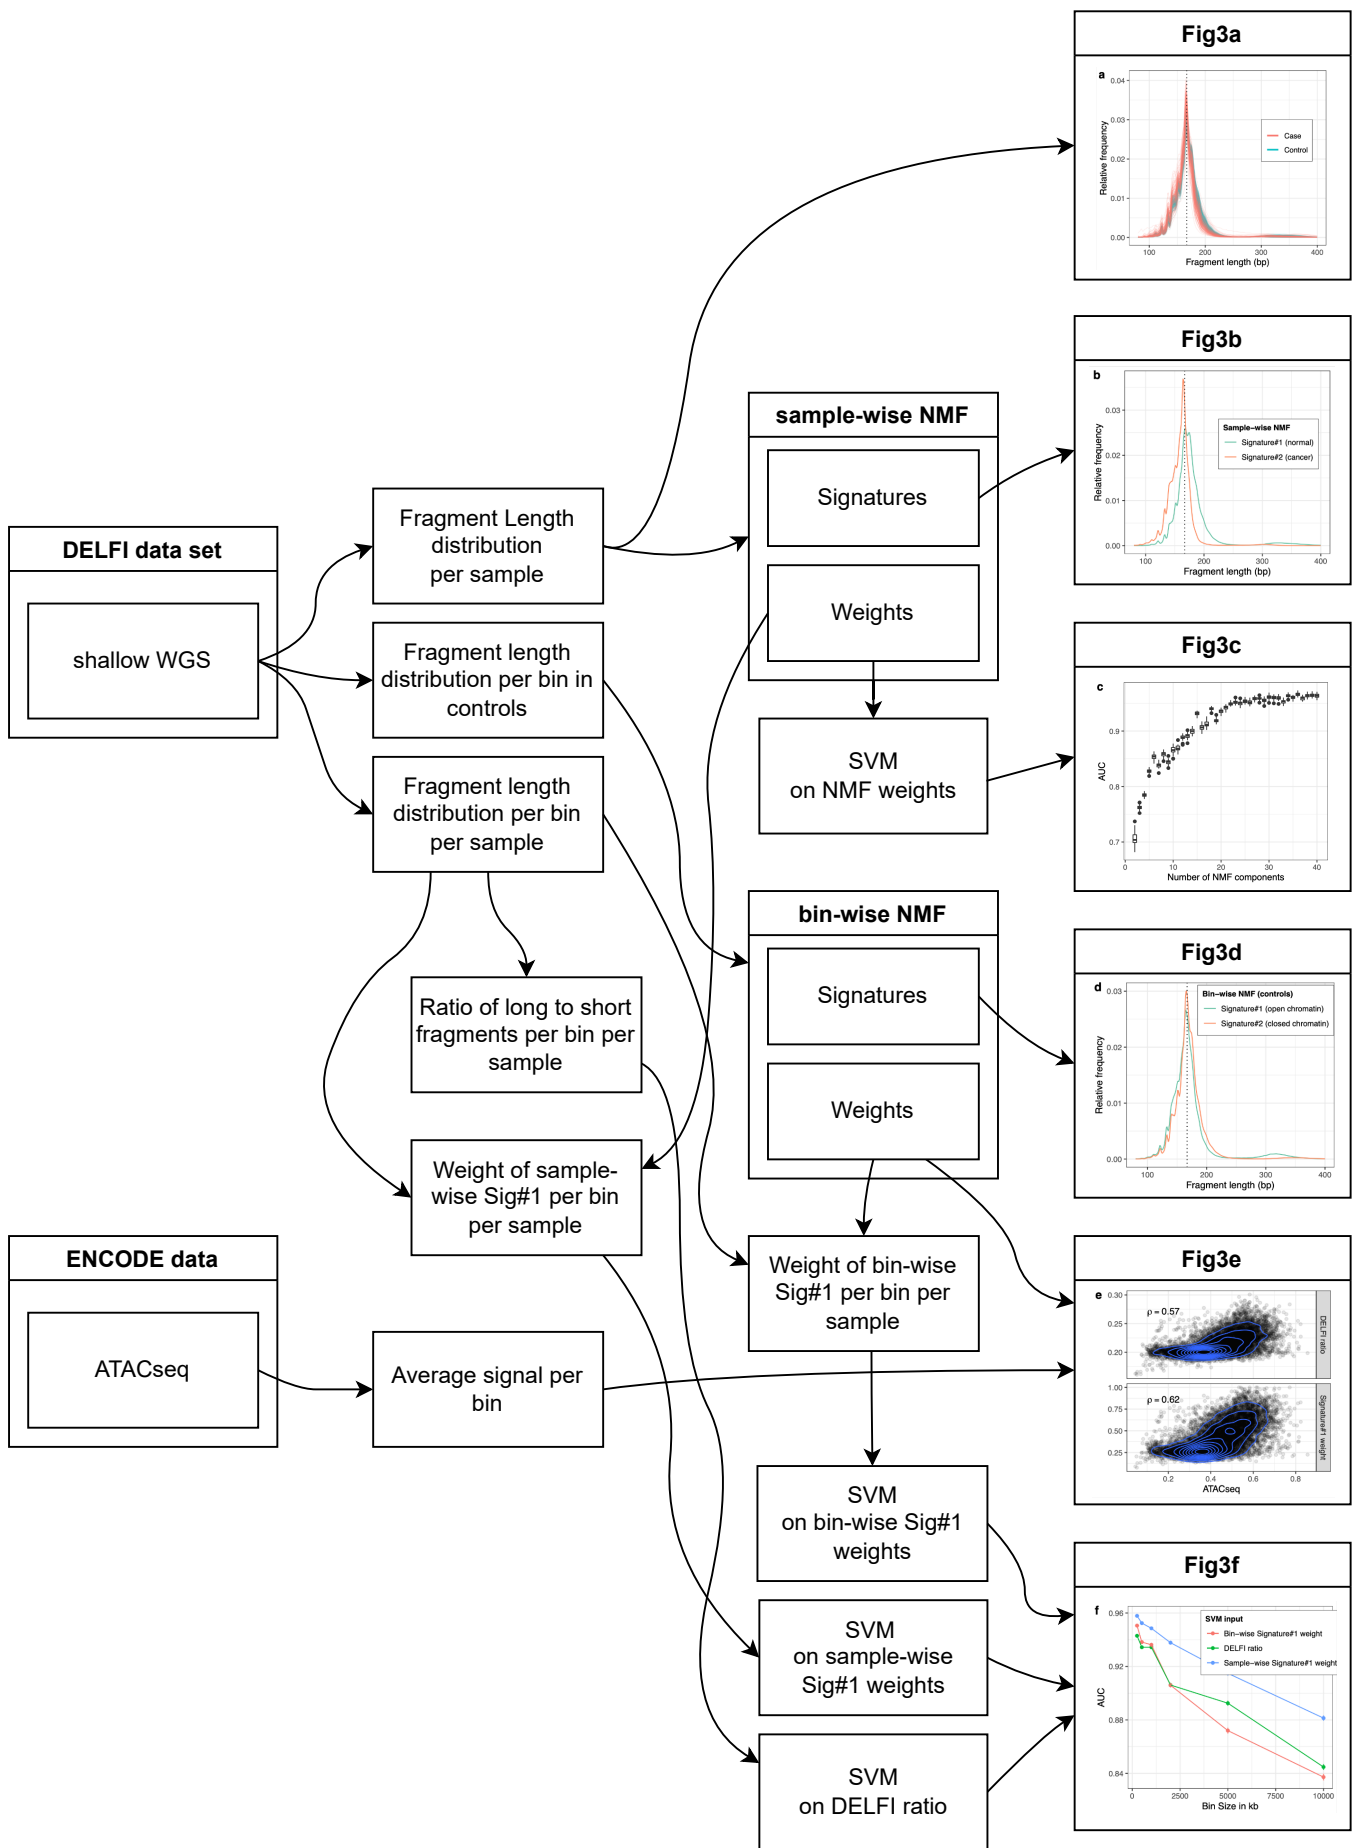

Supplement: supp [file elife-71569-supp-v1.zip]

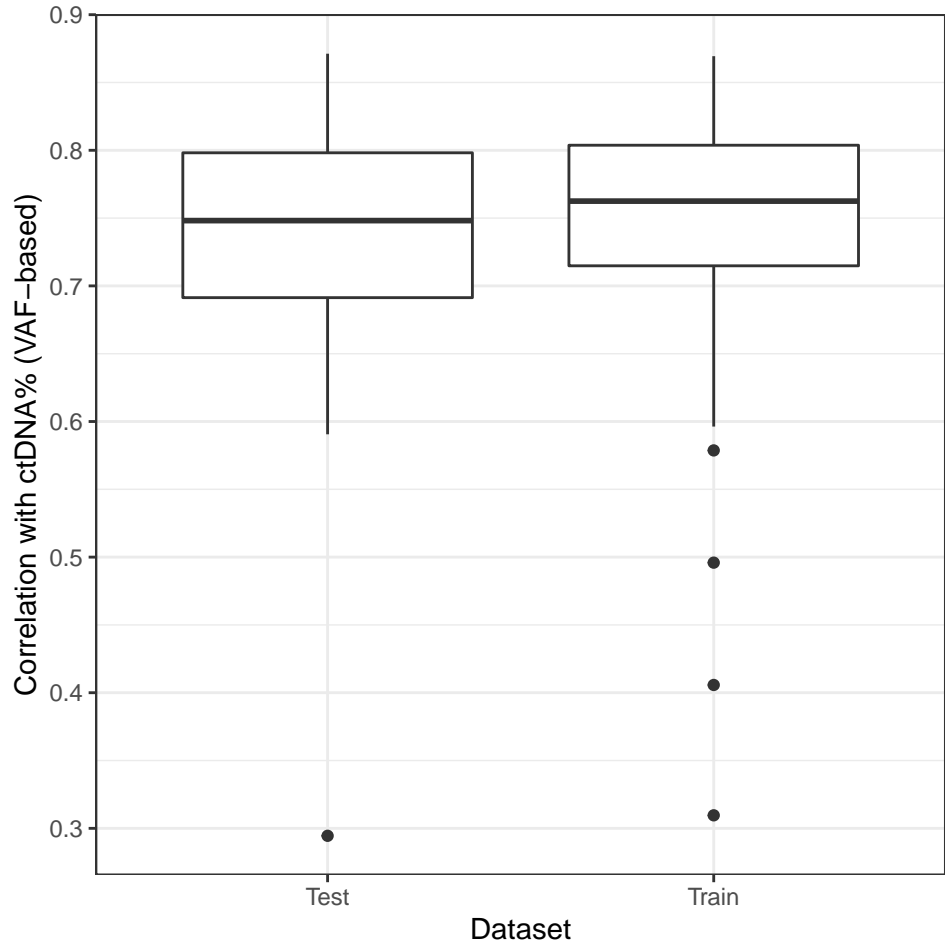

Supplement: supp [file elife-71569-supp-v1.zip]

Cosine distance to signature matrix from NMF on full data set

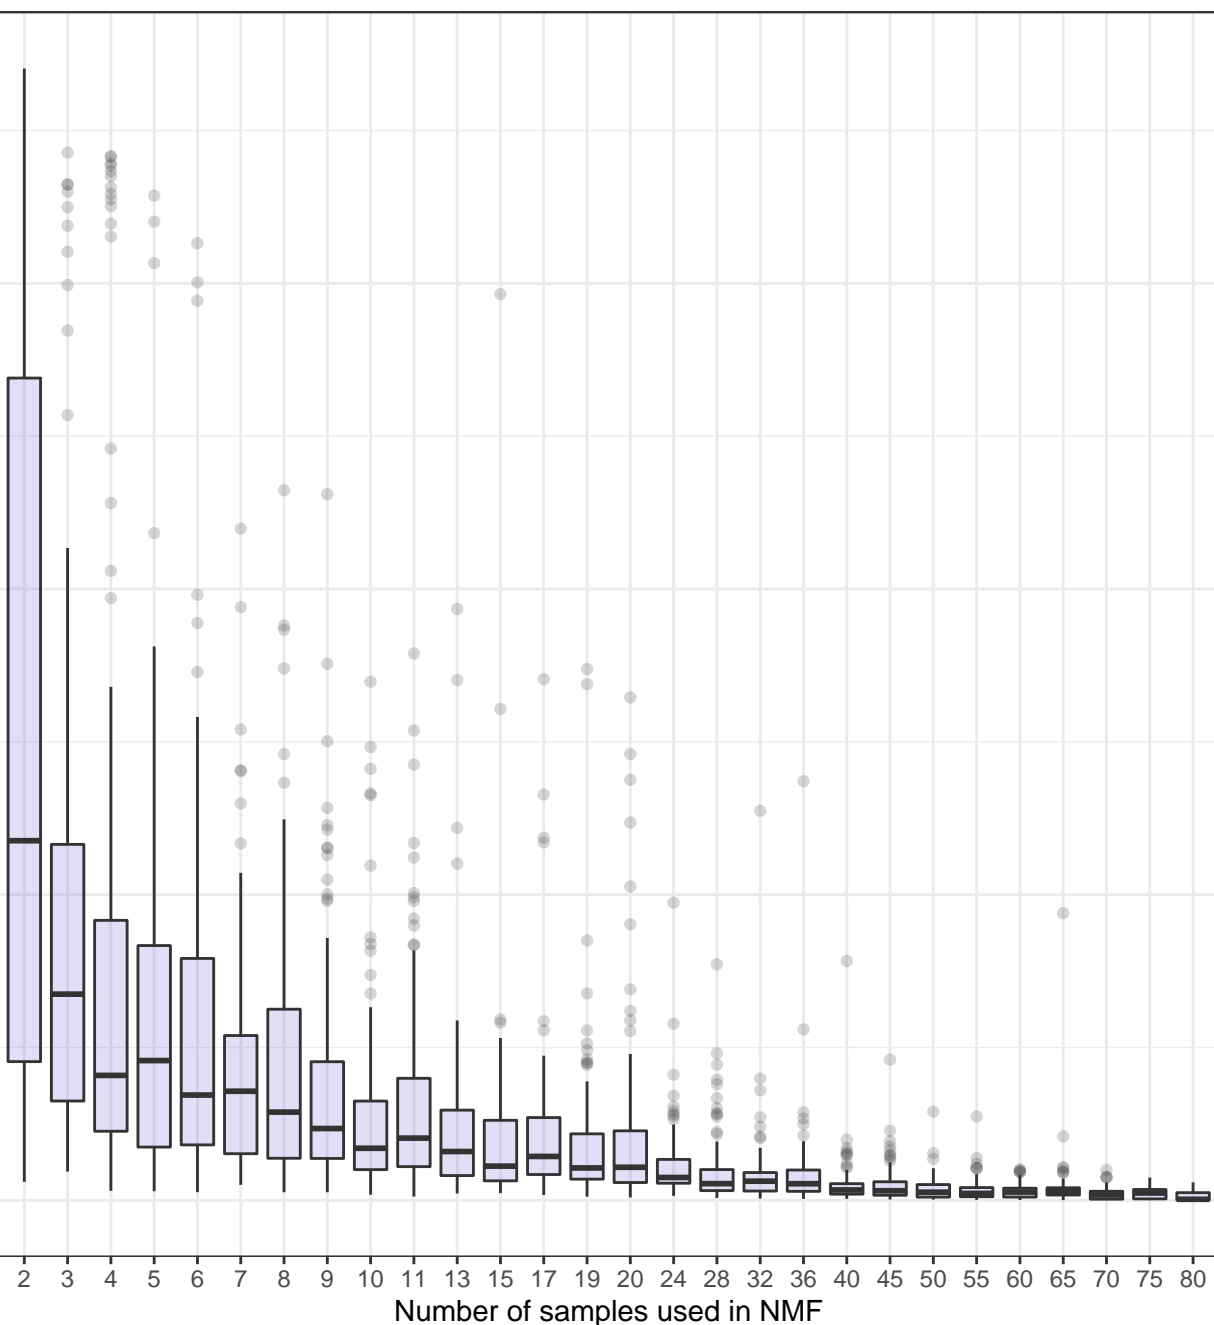

Supplement: supp [file elife-71569-supp-v1.zip]

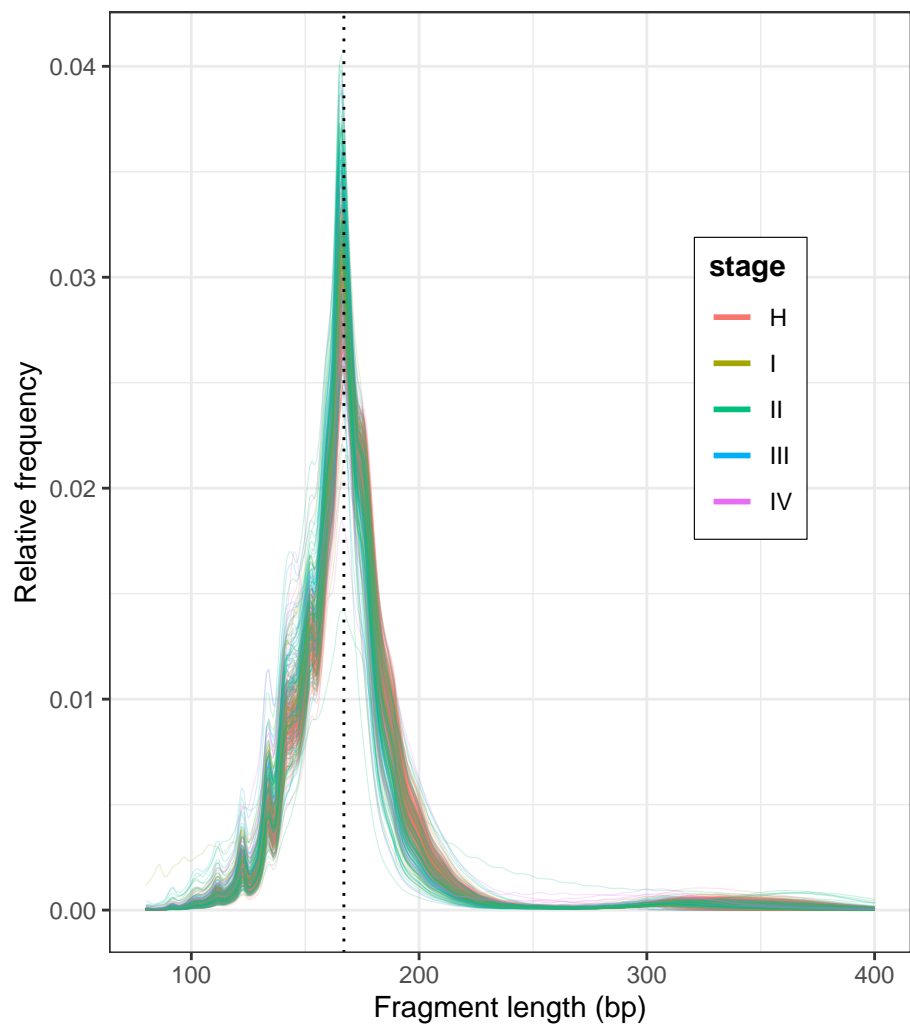

Supplement: supp [file elife-71569-supp-v1.zip]

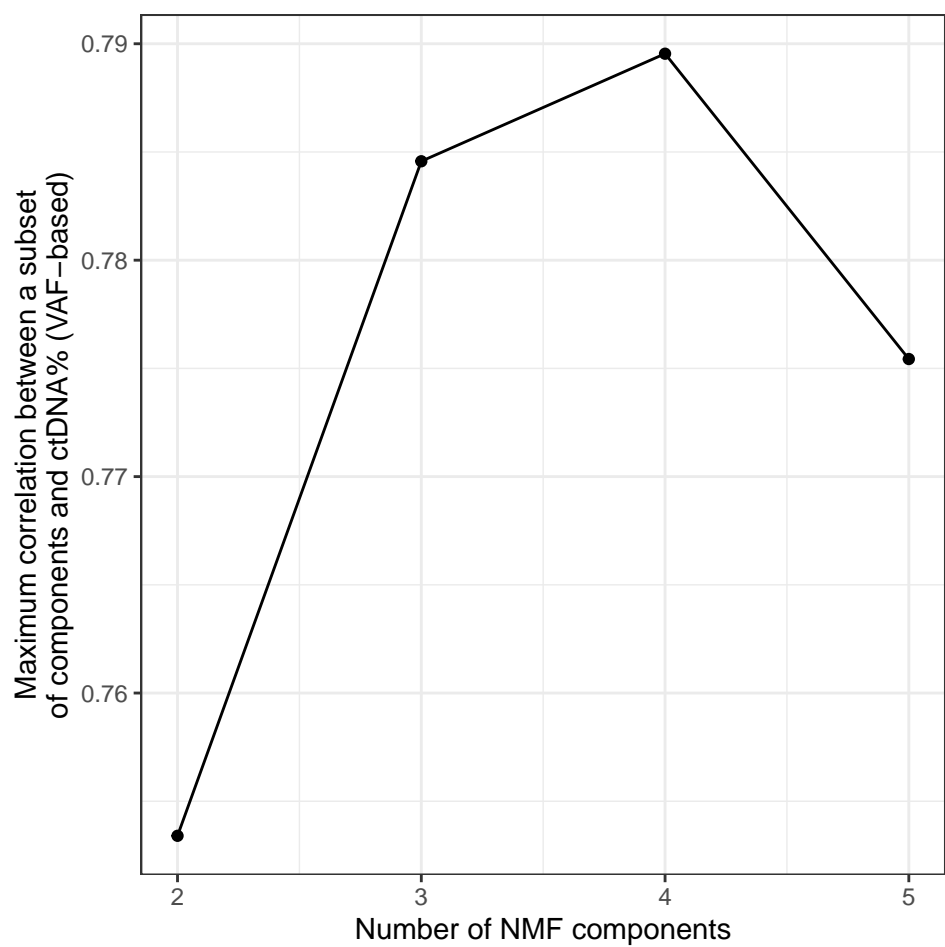

Supplement: supp [file elife-71569-supp-v1.zip]

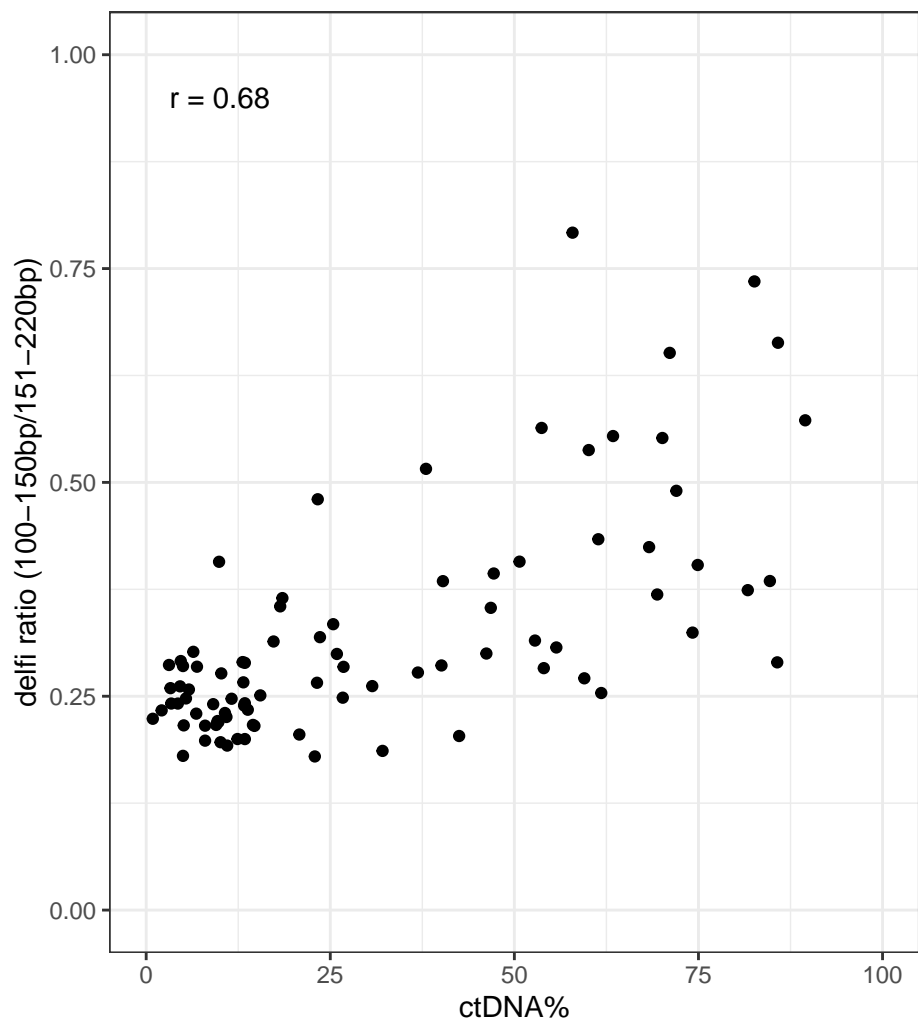

Supplement: supp [file elife-71569-supp-v1.zip]

**a**

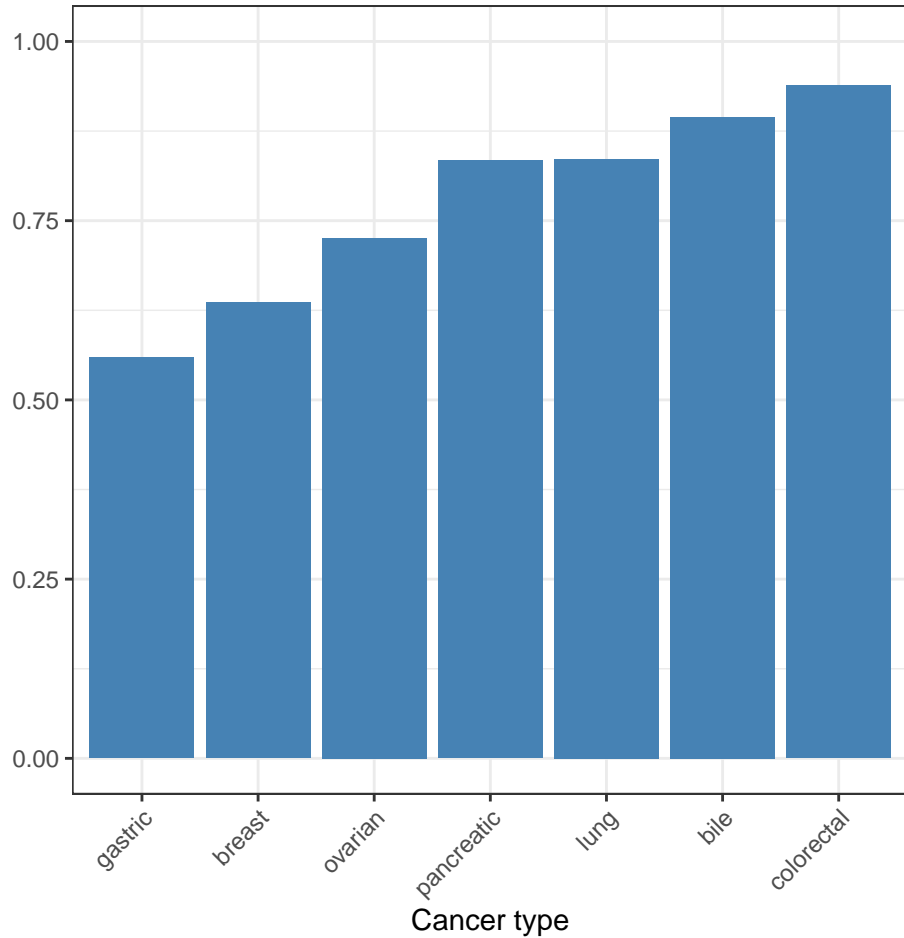**b**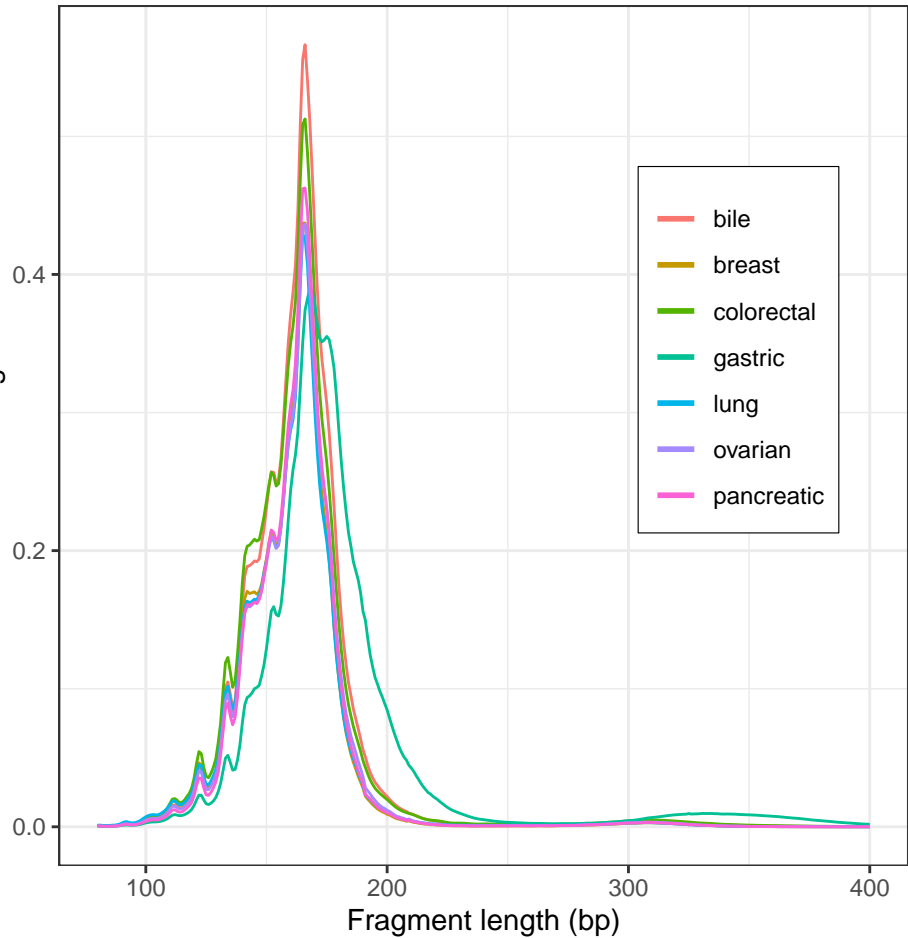

Supplement: supp [file elife-71569-supp-v1.zip]

CGPLLU244

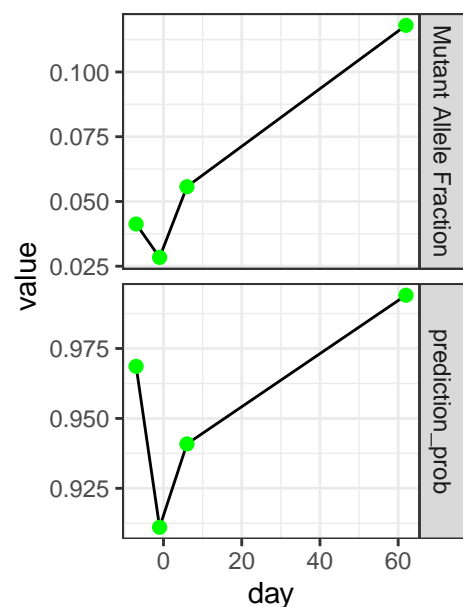

CGPLLU245

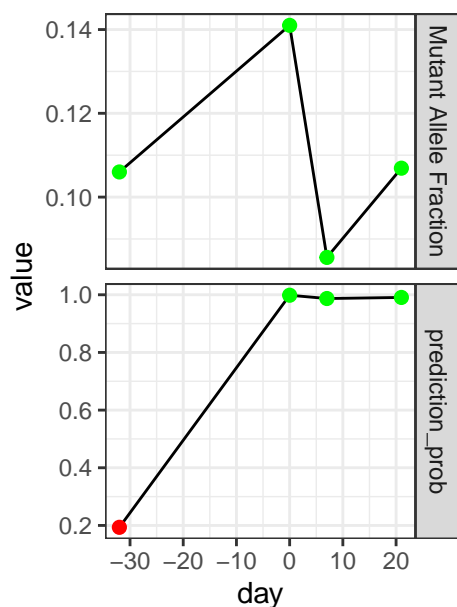

CGPLLU246

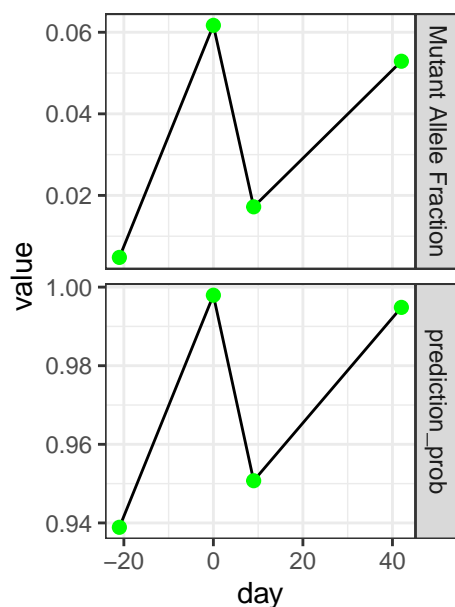

CGPLLU267

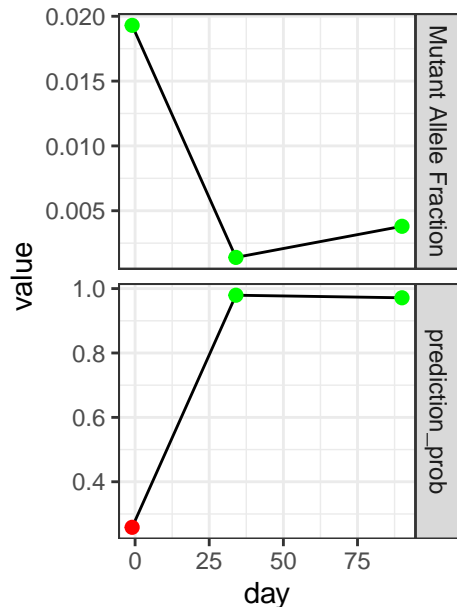

CGPLLU269

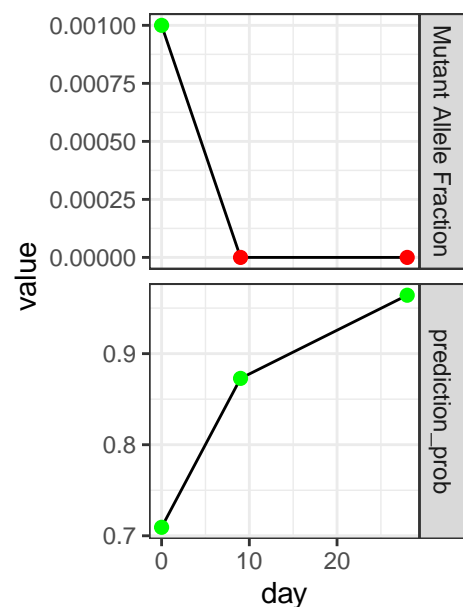

CGPLLU271

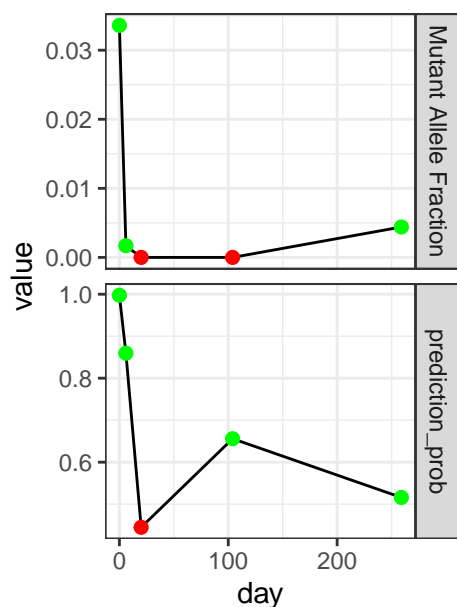

CGPLLU264

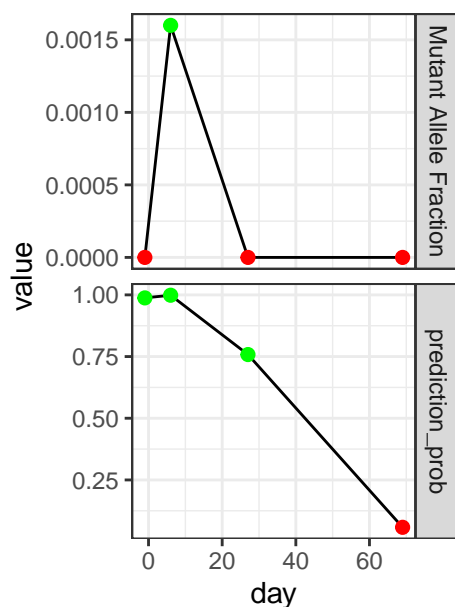

CGPLLU265

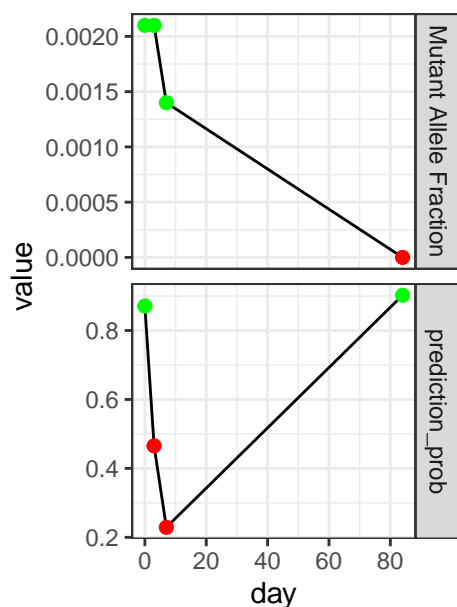

CGPLLU13

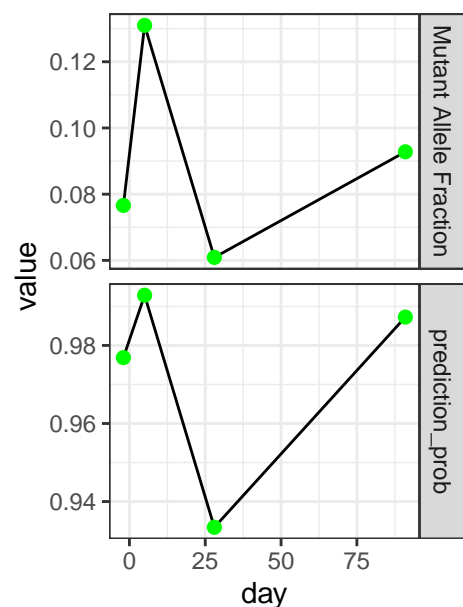

CGPLLU14

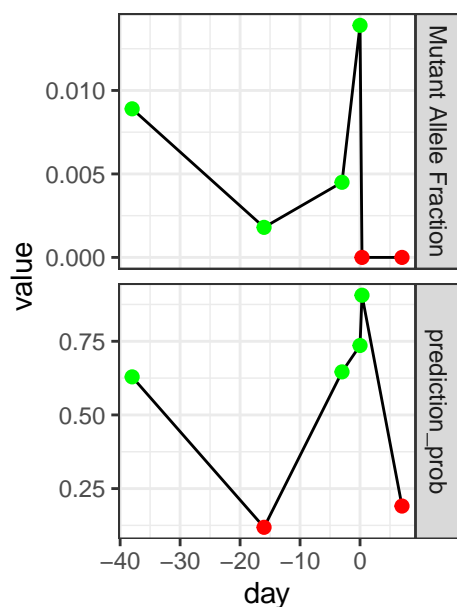

CGPLLU86

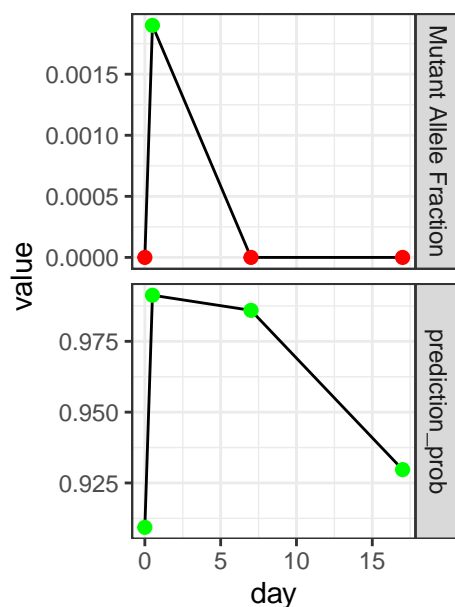

CGPLLU89

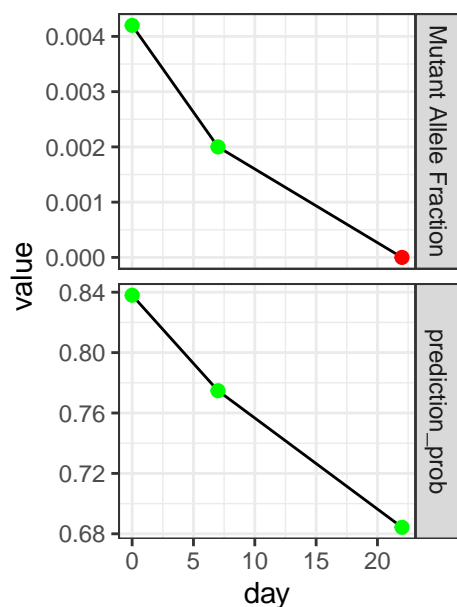

CGPLLU88

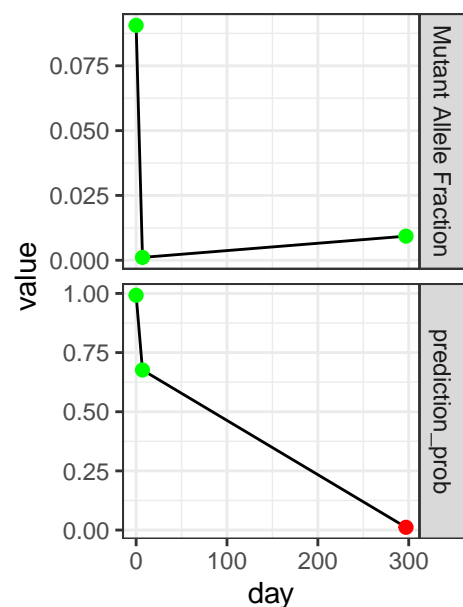

Supplement: supp [file elife-71569-supp-v1.zip]
